# Supplementary material for: Whole genome sequencing reveals the genomic diversity, taxonomic classification, and evolutionary relationships of the genus Nocardia
Source: PubMed Central journal article supplement (PMC8437295; doi:10.1371/journal.pntd.0009665), 2021-08-26
Supplement: pntd.0009665.s001.pdf [file pntd.0009665.s001.pdf]

**S1 Table.** Genome sequences of strains used in this study.

| <i>Nocardia</i>   | Strain                  | Genome Size (Mb) | No. of CDSs | %GC   | Accession Number* | References |
|-------------------|-------------------------|------------------|-------------|-------|-------------------|------------|
| abscessus         | DSM 44432 <sup>T</sup>  | 8.41             | 7811        | 68.2  | GCA_000308455.1   | [1]        |
| abscessus         | DSM 44557               | 8.08             | 7366        | 68.47 | This study        | [1]        |
| abscessus         | CDC 167                 | 7.98             | 7209        | 68.37 | This study        | This study |
| acidivorans       | DSM 45049 <sup>T</sup>  | 7.57             | 7110        | 66.9  | GCA_001625085.1   | This study |
| africana          | DSM 44491 <sup>T</sup>  | 7.81             | 7124        | 67.9  | GCA_001612635.1   | [1]        |
| africana          | DSM 44500               | 7.73             | 7083        | 67.93 | This study        | This study |
| africana          | DSM 44502               | 7.75             | 7319        | 67.91 | GCA_900454335.1   | This study |
| alba              | DSM 44684 <sup>T</sup>  | 7.29             | 6613        | 67.7  | GCA_004339125.1   | This study |
| altamirensis      | DSM 44997 <sup>T</sup>  | 9.83             | 8727        | 66.8  | GCA_001612685.1   | This study |
| amamiensis        | DSM 45066 <sup>T</sup>  | 8.24             | 7818        | 67.4  | GCA_001612745.1   | [1]        |
| amikacinitolerans | DSM 45539 <sup>T</sup>  | 7.64             | 6815        | 68.5  | GCA_001612615.1   | This study |
| amikacinitolerans | DSM 45538               | 7.63             | 6718        | 68.6  | This study        | This study |
| amikacinitolerans | DSM 45537               | 7.38             | 6579        | 68.68 | GCA_900215415.1   | This study |
| anaemiae          | DSM 44821 <sup>T</sup>  | 8.62             | 7791        | 65.5  | GCA_001612725.1   | [1]        |
| aobensis          | DSM 44805 <sup>T</sup>  | 7.55             | 7010        | 68    | GCA_000308375.1   | [1]        |
| araoensis         | DSM 44729 <sup>T</sup>  | 7.72             | 7193        | 68.4  | GCA_000308435.1   | This study |
| arizonensis       | DSM 45748 <sup>T</sup>  | 7.2              | 6547        | 67.9  | GCA_001618405.1   | This study |
| arizonensis       | W9405                   | 7.19             | 6584        | 67.94 | GCA_001310275.1   | This study |
| arthritidis       | DSM 44731 <sup>T</sup>  | 7.12             | 6551        | 68.5  | GCA_001612765.1   | [1]        |
| asiatica          | DSM 44668 <sup>T</sup>  | 8.46             | 8008        | 68.4  | GCA_000308415.1   | [1]        |
| asiatica          | DSM 44700               | 8.19             | 7430        | 68.82 | This study        | This study |
| asiatica          | CDC 193                 | 8.92             | 8219        | 68.39 | This study        | This study |
| asiatica          | CDC 194                 | 7.66             | 6980        | 68.71 | This study        | This study |
| asteroides        | DSM 43757 <sup>T</sup>  | 6.98             | 6422        | 69.9  | GCA_900637185.1   | [2]        |
| asteroides        | DSM 43258               | 7.57             | 6898        | 68.46 | This study        | This study |
| asteroides        | DSM 43373               | 6.95             | 6371        | 69.92 | GCA_900114685.1   | This study |
| beijingensis      | DSM 44636 <sup>T</sup>  | 7.48             | 6856        | 68.9  | GCA_001612785.1   | [1]        |
| beijingensis      | CDC 186                 | 7.20             | 6574        | 69.13 | This study        | This study |
| beijingensis      | CDC 188                 | 7.44             | 6875        | 68.04 | This study        | This study |
| bhagyanarayanae   | DSM 103495 <sup>T</sup> | 7.56             | 6789        | 68.9  | GCA_006716565.1   | This study |
| blacklockiae      | DSM 45135 <sup>T</sup>  | 8.29             | 7361        | 69.9  | This study        | This study |
| blacklockiae      | CDC 190                 | 8.10             | 7267        | 69.82 | This study        | This study |
| brasiliensis      | DSM 43758 <sup>T</sup>  | 8.92             | 8080        | 68.2  | GCA_900454265.1   | [1]        |
| brasiliensis      | DSM 43009               | 9.58             | 8644        | 68.23 | This study        | This study |
| brasiliensis      | DSM 46032               | 9.09             | 8198        | 68.27 | This study        | This study |

|                 |                        |      |      |       |                 |            |
|-----------------|------------------------|------|------|-------|-----------------|------------|
| brasiliensis    | DSM 46059              | 9.30 | 8385 | 68.12 | This study      | This study |
| brasiliensis    | CDC 144                | 9.39 | 8630 | 67.94 | This study      | This study |
| brasiliensis    | CDC 163                | 9.91 | 8913 | 67.88 | This study      | This study |
| brasiliensis    | CDC 196                | 9.39 | 8584 | 68.1  | This study      | This study |
| brasiliensis    | HUJEG-1                | 9.44 | 8517 | 68.05 | GCA_000250675.3 | [3]        |
| brasiliensis    | FDAARGOS 352           | 8.94 | 8083 | 68.24 | GCA_002209125.2 | This study |
| brasiliensis    | IFM 10847              | 9.15 | 8450 | 68.07 | GCA_000710915.1 | This study |
| brevicatena     | DSM 43024 <sup>T</sup> | 7.01 | 6646 | 67    | GCA_000308495.1 | [1]        |
| caishijiensis   | DSM 44831 <sup>T</sup> | 6.29 | 5680 | 68.2  | GCA_001612825.1 | [1]        |
| carnea          | DSM 43397 <sup>T</sup> | 7.5  | 6858 | 67.1  | GCA_000308515.1 | [1]        |
| carnea          | DSM 44558              | 7.88 | 7144 | 66.99 | This study      | [1]        |
| carnea          | DSM 44582              | 7.97 | 7219 | 66.98 | This study      | This study |
| carnea          | DSM 46055              | 7.60 | 6973 | 67.09 | This study      | This study |
| carnea          | DSM 46071              | 8.17 | 7451 | 67.05 | This study      | This study |
| carnea          | NRRL B-1997            | 7.50 | 6871 | 67.09 | GCA_000717405.1 | This study |
| cerradoensis    | DSM 44546 <sup>T</sup> | 7.6  | 7135 | 68.2  | GCA_000308535.1 | [4]        |
| cerradoensis    | CNM20130759            | 8.99 | 8327 | 67.74 | GCA_002236815.1 | This study |
| concava         | DSM 44804 <sup>T</sup> | 8.93 | 8421 | 67.7  | GCA_000308815.1 | This study |
| coubleae        | DSM 44960 <sup>T</sup> | 6.62 | 6102 | 67.9  | GCA_001612805.1 | [1]        |
| crassostreae    | DSM 44597 <sup>T</sup> | 8.29 | 7762 | 67.7  | GCA_001613405.1 | This study |
| cyriacigeorgica | DSM 44484 <sup>T</sup> | 6.31 | 5676 | 68.2  | GCA_005863225.1 | [1]        |
| cyriacigeorgica | DSM 40350              | 6.10 | 5524 | 68.48 | This study      | This study |
| cyriacigeorgica | DSM 43004              | 6.54 | 6149 | 68.38 | This study      | This study |
| cyriacigeorgica | DSM 43005              | 6.54 | 6144 | 68.38 | This study      | This study |
| cyriacigeorgica | DSM 43208              | 6.65 | 5934 | 68.26 | This study      | [1]        |
| cyriacigeorgica | DSM 46058              | 6.36 | 5865 | 68.4  | This study      | This study |
| cyriacigeorgica | CDC 140                | 6.20 | 5569 | 68.38 | This study      | This study |
| cyriacigeorgica | CDC 156                | 6.68 | 6064 | 68.29 | This study      | This study |
| cyriacigeorgica | CDC 182                | 6.48 | 5826 | 68.38 | This study      | This study |
| cyriacigeorgica | CDC 197                | 6.49 | 5863 | 68.35 | This study      | This study |
| cyriacigeorgica | CDC 322                | 6.54 | 5857 | 68.26 | This study      | This study |
| cyriacigeorgica | CDC 323                | 6.42 | 5823 | 68.37 | This study      | This study |
| cyriacigeorgica | CDC 327                | 6.23 | 5616 | 68.46 | This study      | This study |
| cyriacigeorgica | CDC 332                | 6.21 | 5647 | 68.46 | This study      | This study |
| cyriacigeorgica | GUH-2                  | 6.19 | 5572 | 68.37 | GCA_000284035.1 | [5]        |
| cyriacigeorgica | 3012STDY6756504        | 6.48 | 5779 | 68.24 | GCA_900683635.1 | This study |
| cyriacigeorgica | MDA3349                | 6.46 | 5836 | 68.28 | GCA_002949635.1 | This study |
| cyriacigeorgica | MDA3732                | 6.59 | 5935 | 68.22 | GCA_002933455.1 | This study |
| cyriacigeorgica | EML 446                | 6.83 | 5934 | 68.02 | GCA_005863245.1 | [6]        |
| cyriacigeorgica | EML 1456               | 6.52 | 6226 | 68.23 | GCA_005863295.1 | [6]        |

|              |                         |      |      |       |                 |            |
|--------------|-------------------------|------|------|-------|-----------------|------------|
| donostiensis | DSM 46814 <sup>T</sup>  | 5.79 | 5190 | 66.6  | GCA_002081715.1 | [7]        |
| donostiensis | X1655                   | 5.79 | 5159 | 66.57 | GCA_001989395.1 | [7]        |
| donostiensis | W9944                   | 5.77 | 5102 | 66.59 | GCA_002081795.1 | [7]        |
| elegans      | DSM 44890 <sup>T</sup>  | 7.54 | 6937 | 67.9  | GCA_001612845.1 | This study |
| exalbida     | DSM 44883 <sup>T</sup>  | 7.37 | 6772 | 68.6  | GCA_000308575.1 | [1]        |
| farcinica    | DSM 43665 <sup>T</sup>  | 6.46 | 6114 | 70.61 | GCA_001182745.2 | [1]        |
| farcinica    | DSM 46028               | 6.07 | 5640 | 70.93 | This study      | This study |
| farcinica    | CDC 25                  | 6.04 | 5607 | 70.92 | This study      | [8]        |
| farcinica    | CDC 27                  | 6.26 | 5849 | 70.62 | This study      | [8]        |
| farcinica    | CDC 30                  | 6.30 | 5888 | 70.61 | This study      | [8]        |
| farcinica    | CDC 31                  | 6.26 | 5837 | 70.62 | This study      | [8]        |
| farcinica    | CDC 32                  | 6.26 | 5848 | 70.62 | This study      | [8]        |
| farcinica    | CDC 35                  | 6.30 | 5886 | 70.61 | This study      | [8]        |
| farcinica    | CDC 38                  | 6.30 | 5884 | 70.61 | This study      | [8]        |
| farcinica    | CDC 42                  | 6.11 | 5705 | 70.89 | This study      | [8]        |
| farcinica    | CDC 46                  | 6.39 | 5929 | 70.72 | This study      | [8]        |
| farcinica    | CDC 48                  | 6.59 | 6093 | 70.77 | This study      | [8]        |
| farcinica    | CDC 53                  | 6.39 | 5934 | 70.72 | This study      | [8]        |
| farcinica    | CDC 56                  | 6.33 | 5854 | 70.76 | This study      | [8]        |
| farcinica    | CDC 59                  | 6.39 | 5929 | 70.72 | This study      | [8]        |
| farcinica    | CDC 65                  | 6.14 | 5771 | 70.86 | This study      | [8]        |
| farcinica    | CDC 142                 | 6.11 | 5693 | 70.72 | This study      | This study |
| farcinica    | IFM 10152               | 6.29 | 5967 | 70.69 | GCA_000009805.1 | [9]        |
| farcinica    | W6977                   | 6.43 | 6080 | 70.66 | GCA_003367415.1 | This study |
| farcinica    | DSM 43257               | 6.41 | 6074 | 70.68 | GCA_900156775.1 | This study |
| farcinica    | 3012STDY6733949         | 6.14 | 5711 | 70.88 | GCA_900683605.2 | This study |
| farcinica    | CNM20091955             | 6.73 | 6384 | 70.49 | GCA_002571325.1 | [10]       |
| farcinica    | CNM20080921             | 6.75 | 6430 | 70.48 | GCA_002571345.1 | [10]       |
| farcinica    | TRH1                    | 5.23 | 4946 | 68    | GCA_001704135.1 | [11]       |
| flavorosea   | DSM 44480 <sup>T</sup>  | 7.44 | 6840 | 67.1  | GCA_001613385.1 | [1]        |
| fluminea     | DSM 44489 <sup>T</sup>  | 8.06 | 7597 | 67.5  | GCA_002846365.1 | [1]        |
| fusca        | NBRC 14340 <sup>T</sup> | 8.04 | 7283 | 68.1  | GCA_001618425.1 | This study |
| gamkensis    | DSM 44956 <sup>T</sup>  | 7.71 | 7093 | 68.4  | GCA_001612985.1 | [1]        |
| grenadensis  | DSM 45869 <sup>T</sup>  | 6.52 | 6014 | 68.2  | GCA_001613445.1 | This study |
| harenae      | DSM 45095 <sup>T</sup>  | 6.14 | 5608 | 72    | GCA_001612885.1 | This study |
| higoensis    | DSM 44732 <sup>T</sup>  | 6.98 | 5985 | 69.3  | GCA_000308595.1 | This study |
| ignorata     | DSM 44496 <sup>T</sup>  | 7.02 | 6614 | 67.7  | GCA_004362495.1 | [1]        |
| inohanensis  | DSM 44667 <sup>T</sup>  | 8.12 | 7423 | 67.8  | GCA_001612945.1 | This study |
| inohanensis  | CDC 153                 | 8.22 | 7589 | 67.93 | This study      | This study |
| jejuensis    | DSM 44959 <sup>T</sup>  | 8.65 | 7619 | 67.6  | GCA_001613145.1 | This study |

|                  |                        |       |      |       |                 |            |
|------------------|------------------------|-------|------|-------|-----------------|------------|
| jiangxiensis     | DSM 17684 <sup>T</sup> | 10.45 | 9617 | 66.8  | GCA_000308615.1 | This study |
| jinanensis       | DSM 45048 <sup>T</sup> | 5.04  | 4626 | 67.4  | GCA_001482675.1 | [12]       |
| kruczakiae       | DSM 44877 <sup>T</sup> | 7.32  | 6692 | 68.1  | GCA_001612965.1 | [1]        |
| lijiangensis     | DSM 44933 <sup>T</sup> | 8.16  | 7287 | 68.5  | GCA_001613045.1 | This study |
| mangyaensis      | Y48 <sup>T</sup>       | 7.31  | 6591 | 68.1  | GCA_001886715.1 | This study |
| mexicana         | DSM 44952 <sup>T</sup> | 9     | 8161 | 68.7  | GCA_003350525.1 | This study |
| mikamii          | DSM 45174 <sup>T</sup> | 7.56  | 6577 | 68    | GCA_001613505.1 | This study |
| miyunensis       | DSM 17685 <sup>T</sup> | 10.52 | 8990 | 67    | GCA_001613065.1 | This study |
| neocaledoniensis | DSM 44717 <sup>T</sup> | 7.32  | 6798 | 69.7  | GCA_003182135.1 | [1]        |
| niigatensis      | DSM 44670 <sup>T</sup> | 8.22  | 7266 | 68.2  | GCA_000308655.1 | This study |
| ninae            | DSM 44978 <sup>T</sup> | 9.7   | 8884 | 66.9  | GCA_007990755.1 | This study |
| niwae            | DSM 45340 <sup>T</sup> | 7.3   | 6408 | 68.8  | GCA_001613465.1 | This study |
| nova             | DSM 44481 <sup>T</sup> | 7.84  | 7203 | 67.9  | GCA_001613005.1 | [1]        |
| nova             | DSM 43207              | 7.86  | 7081 | 67.86 | This study      | [1]        |
| nova             | DSM 40806              | 7.85  | 7141 | 67.79 | This study      | This study |
| nova             | DSM 43209              | 7.87  | 7090 | 67.86 | This study      | This study |
| nova             | DSM 44559              | 7.81  | 7061 | 67.94 | This study      | This study |
| nova             | CDC 141                | 7.86  | 7376 | 68.57 | This study      | This study |
| nova             | CDC 159                | 7.87  | 7381 | 68.57 | This study      | This study |
| nova             | SH22a                  | 8.35  | 7579 | 67.77 | GCA_000523235.1 | [1]        |
| nova             | MDA3397                | 8.01  | 7299 | 67.86 | GCA_002933545.1 | This study |
| nova             | ATCC 10905             | 7.85  | 7076 | 68.02 | GCA_002933515.1 | This study |
| nova             | ATCC 33727             | 7.55  | 6939 | 67.91 | GCA_003023865.1 | This study |
| nova             | BAA2227                | 7.97  | 7265 | 67.87 | GCA_002933495.1 | This study |
| nova             | MDA5529                | 7.71  | 7032 | 68    | GCA_002933575.1 | This study |
| nova             | MDA3139                | 7.49  | 7047 | 67.31 | GCA_002933535.1 | This study |
| nova             | MDA0897                | 7.07  | 6565 | 67.46 | GCA_002933465.1 | This study |
| novocastrense    | DSM 44692 <sup>T</sup> | 6.69  | 6308 | 71.7  | This study      | This study |
| otitidiscaviarum | DSM 43242 <sup>T</sup> | 7.54  | 6888 | 69    | GCA_900454305.1 | [1]        |
| otitidiscaviarum | DSM 44565              | 7.33  | 6653 | 69.04 | This study      | [1]        |
| otitidiscaviarum | DSM 43010              | 7.36  | 6729 | 68.99 | This study      | This study |
| otitidiscaviarum | DSM 43398              | 7.51  | 6766 | 69.03 | This study      | This study |
| otitidiscaviarum | CDC 155                | 7.25  | 6596 | 69.08 | This study      | This study |
| otitidiscaviarum | CDC 157                | 7.61  | 6922 | 68.97 | This study      | This study |
| otitidiscaviarum | CDC 195                | 7.30  | 6645 | 69.03 | This study      | This study |
| otitidiscaviarum | CDC 324                | 7.66  | 6938 | 68.97 | This study      | This study |
| otitidiscaviarum | CDC 326                | 7.57  | 6912 | 69.04 | This study      | This study |
| otitidiscaviarum | NEB252                 | 7.69  | 6874 | 69.06 | GCA_007362295.1 | This study |
| otitidiscaviarum | IFM 11049              | 7.90  | 7410 | 68.88 | GCA_000710895.1 | [2]        |
| paucivorans      | DSM 44386 <sup>T</sup> | 6     | 5048 | 66.6  | GCA_000308675.1 | This study |

|                    |                           |      |      |       |                 |            |
|--------------------|---------------------------|------|------|-------|-----------------|------------|
| panacis            | YIM PH 21724 <sup>T</sup> | 7.36 | 6802 | 67    | GCA_003598715.1 | [13]       |
| pneumoniae         | DSM 44730 <sup>T</sup>    | 7.59 | 6729 | 68.1  | GCA_000308755.1 | [1]        |
| pseudobrasiliensis | DSM 44290 <sup>T</sup>    | 8.4  | 7895 | 67.3  | GCA_003350585.1 | [1]        |
| pseudobrasiliensis | IFM 0761                  | 8.39 | 7908 | 67.55 | GCA_001304815.1 | This study |
| pseudovaccinii     | DSM 43406 <sup>T</sup>    | 9.94 | 9284 | 65.7  | GCA_001613225.1 | This study |
| puris              | DSM 44599 <sup>T</sup>    | 7.7  | 7045 | 69.8  | GCA_003315035.1 | This study |
| rhamnosiphila      | DSM 45147 <sup>T</sup>    | 7.66 | 6875 | 68.5  | GCA_001613485.1 | [1]        |
| salmonicida        | DSM 40472 <sup>T</sup>    | 8.25 | 7417 | 67    | GCA_001613085.1 | This study |
| salmonicida        | NBRC 100378               | 7.50 | 6956 | 67.07 | GCA_001612865.1 | This study |
| salmonicida        | NBRC 100376               | 7.55 | 7022 | 67.05 | GCA_001613285.1 | This study |
| seriolae           | DSM 44129 <sup>T</sup>    | 7.6  | 7138 | 68.3  | GCA_007990715.1 | This study |
| seriolae           | EM150506                  | 8.30 | 7781 | 68.08 | GCA_001865855.1 | [14]       |
| seriolae           | UTF1                      | 8.12 | 7648 | 68.14 | GCA_002356035.1 | [14]       |
| seriolae           | CK-14008                  | 8.37 | 7893 | 68.09 | GCA_001885535.1 | [14]       |
| seriolae           | HSY-NS01                  | 7.91 | 7441 | 68.19 | GCA_003013595.1 | This study |
| seriolae           | SY-24                     | 7.89 | 7446 | 68.21 | GCA_002093935.1 | [14]       |
| seriolae           | HSY-NS02                  | 7.76 | 7274 | 68.23 | GCA_003667075.1 | This study |
| seriolae           | ZJ0503                    | 7.71 | 7268 | 68.25 | GCA_000763165.1 | [14]       |
| seriolae           | N-2927                    | 7.76 | 7319 | 68.27 | GCA_000583715.2 | [14]       |
| seriolae           | U-1                       | 7.77 | 7317 | 68.26 | GCA_001192935.1 | [14]       |
| seriolae           | KH 21                     | 7.72 | 7262 | 68.26 | GCA_009712555.1 | This study |
| seriolae           | PY 31                     | 7.68 | 7241 | 68.28 | GCA_009712525.1 | This study |
| seriolae           | VT 62                     | 7.70 | 7260 | 68.28 | GCA_009712405.1 | This study |
| seriolae           | VT 45                     | 7.94 | 7506 | 68.2  | GCA_009712575.1 | This study |
| seriolae           | NT 50                     | 7.96 | 7515 | 68.17 | GCA_009712505.1 | This study |
| seriolae           | KH 11                     | 7.66 | 7249 | 68.28 | GCA_009712515.1 | This study |
| seriolae           | PY 37                     | 7.55 | 7236 | 68.29 | GCA_009712525.1 | This study |
| shimofusensis      | DSM 44733 <sup>T</sup>    | 6.33 | 5670 | 69.1  | GCA_001613125.1 | This study |
| sienata            | DSM 44766 <sup>T</sup>    | 6.84 | 6262 | 68.2  | GCA_001613205.1 | [1]        |
| speluncae          | DSM 45078 <sup>T</sup>    | 7.4  | 6765 | 66.9  | GCA_001613245.1 | This study |
| stercoris          | NEAU-LL90 <sup>T</sup>    | 7.55 | 6670 | 69.1  | GCA_003696265.1 | This study |
| suismassiliense    | S-137 <sup>T</sup>        | 9.47 | 8501 | 67.1  | GCA_900269665.1 | [15]       |
| takedensis         | DSM 44801 <sup>T</sup>    | 8.03 | 7206 | 69.5  | GCA_000308695.1 | This study |
| tenerifensis       | DSM 44704 <sup>T</sup>    | 9.84 | 8917 | 68.5  | GCA_003202065.1 | This study |
| terpenica          | IFM 0406                  | 9.28 | 8681 | 68.5  | GCA_001625105.1 | This study |
| testacea           | DSM 44765 <sup>T</sup>    | 7.27 | 6817 | 68.5  | GCA_000308775.1 | This study |
| thailandica        | DSM 44808 <sup>T</sup>    | 6.82 | 6520 | 71.6  | GCA_000308795.1 | [1]        |
| transvalensis      | DSM 43405 <sup>T</sup>    | 8.38 | 7815 | 69.2  | GCA_000308875.1 | [1]        |
| transvalensis      | DSM 46068                 | 8.72 | 8075 | 69.23 | This study      | [1]        |
| uniformis          | DSM 43136 <sup>T</sup>    | 8.77 | 8055 | 66    | GCA_001613345.1 | This study |

|                     |                         |       |      |       |                 |            |
|---------------------|-------------------------|-------|------|-------|-----------------|------------|
| vaccinii            | DSM 43285 <sup>T</sup>  | 9.22  | 8405 | 66.7  | GCA_001613305.1 | This study |
| vaccinii            | CDC 160                 | 8.57  | 7787 | 67.45 | This study      | This study |
| vermiculata         | DSM 44807 <sup>T</sup>  | 6.69  | 6157 | 67    | GCA_001613265.1 | This study |
| veterana            | DSM 44445 <sup>T</sup>  | 6.79  | 6188 | 68.2  | GCA_000308855.1 | [1]        |
| veterana            | CDC 181                 | 6.54  | 5890 | 68.29 | This study      | This study |
| vinacea             | DSM 44638 <sup>T</sup>  | 10.16 | 9349 | 65.5  | GCA_000308835.1 | [1]        |
| violaceofusca       | NBRC 14427 <sup>T</sup> | 7.51  | 6828 | 68    | GCA_001613525.1 | This study |
| vulneris            | DSM 45737 <sup>T</sup>  | 9.37  | 8459 | 68.1  | GCA_001613425.1 | [16]       |
| wallacei            | DSM 45136 <sup>T</sup>  | 8.04  | 7325 | 69.1  | This study      | [1]        |
| wallacei            | DSM 45846               | 7.29  | 6479 | 69.48 | This study      | This study |
| xishanensis         | DSM 44895 <sup>T</sup>  | 7.69  | 7049 | 68.4  | GCA_001613365.1 | This study |
| yamanashiensis      | DSMZ 44669 <sup>T</sup> | 9.1   | 8385 | 68.1  | GCA_001613325.1 | This study |
| yunnanensis         | CFHS0054 <sup>T</sup>   | 7.93  | 7477 | 68.4  | This study      | [17]       |
| <i>Nocardia</i> sp. | CS682                   | 8.92  | 8117 | 67.26 | GCA_004634405.1 | [18]       |
| <i>Nocardia</i> sp. | BMG51109                | 9.14  | 7726 | 69.19 | GCA_000526215.1 | This study |
| <i>Nocardia</i> sp. | W9405                   | 7.19  | 6587 | 67.94 | GCA_001310275.1 | This study |
| <i>Nocardia</i> sp. | NRRL WC-3656            | 7.27  | 6598 | 67.93 | GCA_000720265.1 | [19]       |
| <i>Nocardia</i> sp. | Root136                 | 7.28  | 6710 | 67.32 | GCA_001427185.1 | This study |
| <i>Nocardia</i> sp. | 852002-20019_SCH5090214 | 8.27  | 7573 | 67.88 | GCA_001665865.1 | This study |
| <i>Nocardia</i> sp. | 852002-51101_SCH5132738 | 7.66  | 7079 | 67.85 | GCA_001665695.1 | This study |
| <i>Nocardia</i> sp. | 852002-51244_SCH5132740 | 7.69  | 7087 | 67.9  | GCA_001665525.1 | This study |
| <i>Nocardia</i> sp. | FDAARGOS_372            | 6.46  | 6047 | 70.64 | GCA_002554515.1 | This study |
| <i>Nocardia</i> sp. | MDA0666                 | 7.02  | 6380 | 68.01 | GCA_003023875.1 | This study |
| <i>Nocardia</i> sp. | SYSU K10002             | 9.37  | 8651 | 67.36 | GCA_003123685.1 | This study |
| <i>Nocardia</i> sp. | CICC 11023              | 10.03 | 9175 | 67.4  | GCA_008704205.1 | This study |
| <i>Nocardia</i> sp. | RB20                    | 8.54  | 7517 | 67.22 | GCA_009604405.1 | This study |
| <i>Nocardia</i> sp. | RB56                    | 8.62  | 7610 | 69.4  | GCA_009604425.1 | This study |
| <i>Nocardia</i> sp. | SYP-A9097               | 9.05  | 8293 | 65.81 | GCA_009649815.1 | This study |
| <i>Nocardia</i> sp. | CT2-14                  | 7.38  | 6615 | 67.86 | GCA_009708175.1 | This study |
| <i>Nocardia</i> sp. | BMG111209               | 9.14  | 8068 | 69.19 | GCA_000381925.1 | [20]       |
| <i>Nocardia</i> sp. | CNY236                  | 5.3   | 4960 | 65.14 | GCA_000482385.1 | This study |
| <i>Nocardia</i> sp. | ET3-3                   | 9.31  | 8681 | 68    | GCA_009760405.1 | This study |
| <i>Nocardia</i> sp. | 348MFTsu5               | 5.71  | 5303 | 63.9  | GCA_000383535.1 | This study |
| <i>Nocardia</i> sp. | NRRL S-836              | 9.85  | 9058 | 70.56 | GCA_001279525.1 | This study |

<sup>T</sup> type strain

\*The sequence data for newly sequenced isolates have been deposited in the GSA under accession number CRA003805.

## Reference

1. McTaggart LR, Richardson SE, Witkowska M, Zhang SX. Phylogeny and Identification of *Nocardia* Species on the Basis of Multilocus Sequence Analysis. *J Clin Microbiol.* 2010;48: 4525–4533. doi:10.1128/JCM.00883-10
2. Komaki H, Ichikawa N, Hosoyama A, Takahashi-Nakaguchi A, Matsuzawa T, Suzuki K, *et al.* Genome based analysis of type-I polyketide synthase and nonribosomal peptide synthetase gene clusters in seven strains of five representative *Nocardia* species. *BMC Genomics.* 2014;15: 323. doi:10.1186/1471-2164-15-323
3. Vera-Cabrera L, Ortiz-Lopez R, Elizondo-Gonzalez R, Ocampo-Candiani J. Complete Genome Sequence Analysis of *Nocardia brasiliensis* HUJEG-1 Reveals a Saprobic Lifestyle and the Genes Needed for Human Pathogenesis. Gordon SV, editor. *PLoS ONE.* 2013;8: e65425. doi:10.1371/journal.pone.0065425
4. Carrasco G, Monzón S, Jiménez P, Cuesta I, Bartolomé-Alvarez J, Valdezate S. First Draft Genome Sequence of a Clinical Strain of *Nocardia cerradoensis*. *Genome Announc.* 2017;5. doi:10.1128/genomeA.00551-17
5. Zoropogui A, Pujic P, Normand P, Barbe V, Belli P, Graindorge A, *et al.* The *Nocardia cyriacigeorgica* GUH-2 genome shows ongoing adaptation of an environmental Actinobacteria to a pathogen's lifestyle. *BMC Genomics.* 2013;14: 286. doi:10.1186/1471-2164-14-286
6. Vautrin F, Bergeron E, Dubost A, Abrouk D, Martin C, Cournoyer B, *et al.* Genome Sequences of Three *Nocardia cyriacigeorgica* Strains and One *Nocardia asteroides* Strain. *Microbiol Resour Announc.* 2019;8: e00600-19. doi:10.1128/MRA.00600-19
7. Ercibengoa M, Bell M, Marimón JM, Humrighouse B, Klenk H-P, Pötter G, *et al.* *Nocardia donostiensis* sp. nov., isolated from human respiratory specimens. *Antonie Van Leeuwenhoek.* 2016;109: 653–660. doi:10.1007/s10482-016-0667-8
8. Du P, Hou X, Xie Y, Xu S, Li L, Zhang J, *et al.* Genotyping of *Nocardia farcinica* with multilocus sequence typing. *Eur J Clin Microbiol Infect Dis.* 2016;35: 771–778. doi:10.1007/s10096-016-2596-x
9. Ishikawa J, Yamashita A, Mikami Y, Hoshino Y, Kurita H, Hotta K, *et al.* The complete genomic sequence of *Nocardia farcinica* IFM 10152. *Proc Natl Acad Sci.* 2004;101: 14925–14930. doi:10.1073/pnas.0406410101

10. Valdezate S, Monzón S, Garrido N, Zaballos A, Medina-Pascual MJ, Azcona-Gutiérrez JM, *et al.* First Insight into the Genome Sequences of Two Linezolid-Resistant *Nocardia farcinica* Strains Isolated from Patients with Cystic Fibrosis. *Genome Announc.* 2017;5. doi:10.1128/genomeA.01212-17
11. Rodrigues EM, Vidigal PMP, Pylro VS, Morais DK, Leite LR, Roesch LFW, *et al.* Draft genome of *Nocardia farcinica* TRH1, a linear and polycyclic aromatic hydrocarbon-degrading bacterium isolated from the coast of Trindade Island, Brazil. *Brazilian Journal of Microbiology.* 2017;48: 391–392. doi:10.1016/j.bjm.2016.09.014
12. Chakraborti A, Li J, Liang Z-X. Draft Genome Sequence of *Nocardia jinanensis*, an Opportunistic Bacterial Pathogen That Causes Cellulitis. *Genome Announc.* 2016;4. doi:10.1128/genomeA.00593-16
13. Hu J-Y, Li L, Peng G, Li Y-Q, Xu L-H, Guan H-L, *et al.* *Nocardia panacis* sp. nov., a novel actinomycete with antiphytopathogen activity isolated from the rhizosphere of *Panax notoginseng*. *Antonie van Leeuwenhoek.* 2020;113: 165–174. doi:10.1007/s10482-019-01326-z
14. Han H, Kwak M, Ha S, Yang S, Kim JD, Cho K, *et al.* Genomic characterization of *Nocardia seriola* strains isolated from diseased fish. *MicrobiologyOpen.* 2019;8: e00656. doi:10.1002/mbo3.656
15. Fellag M, Levasseur A, Delerce J, Bittar F, Marié J-L, Davoust B, *et al.* Draft Genome Sequence of “*Nocardia suismassiliense*” Strain S-137 (CSUR P4007). *Genome Announc.* 2018;6: e00212-18. doi:10.1128/genomeA.00212-18
16. Lasker BA, Bell M, Klenk H-P, Spröer C, Schumann P, Brown JM. *Nocardia vulneris* sp. nov., isolated from wounds of human patients in North America. *Antonie van Leeuwenhoek.* 2014;106: 543–553. doi:10.1007/s10482-014-0226-0
17. Zhang J-X, Ming H, Zhao Z-L, Ji W-L, Chang X-L, Zhang L-Y, *et al.* *Nocardia yunnanensis* sp. nov., an actinomycete isolated from a soil sample. *Int J Syst Evol Microbiol.* 2019;69: 3116–3120. doi:10.1099/ijsem.0.003600
18. Dhakal D, Rayamajhi V, Nguyen HT, Poudel PB, Sohng JK. Complete Genome Sequence of *Nocardia* sp. Strain CS682, a Producer of Antibacterial Compound Nargenicin A1. *Microbiol Resour Announc.* 2019;8. doi:10.1128/MRA.01098-19



19. Ju K-S, Gao J, Doroghazi JR, Wang K-KA, Thibodeaux CJ, Li S, et al. Discovery of phosphonic acid natural products by mining the genomes of 10,000 actinomycetes. *Proc Natl Acad Sci.* 2015;112: 12175–12180. doi:10.1073/pnas.1500873112
20. Ghodhbane-Gtari F, Beauchemin N, Gueddou A, Hezbri K, Ktari A, Louati M, et al. Permanent Draft Genome Sequence of *Nocardia* sp. BMG111209, an Actinobacterium Isolated from Nodules of *Casuarina glauca*. *Genome Announc.* 2016;4. doi:10.1128/genomeA.00770-16.
