# Supplementary material for: Whole genome sequencing reveals the genomic diversity, taxonomic classification, and evolutionary relationships of the genus Nocardia
Source: PubMed Central journal article supplement (PMC8437295; doi:10.1371/journal.pntd.0009665), 2021-08-26
Supplement: pntd.0009665.s002.pdf [file pntd.0009665.s002.pdf]

**S2 Table.** List of 107 predicted horizontally transferred genes in core genome

| <b>Protein accession number in <i>N. abscessus</i><br/>NBRC 100374</b> | <b>Gene name</b> | <b>Genome<br/>type</b> |
|------------------------------------------------------------------------|------------------|------------------------|
| WP_043688224.1                                                         | <i>atpD</i>      | core                   |
| WP_011206964.1                                                         | <i>carD</i>      | core                   |
| WP_043686876.1                                                         | <i>citA</i>      | core                   |
| WP_043688668.1                                                         | <i>clpX</i>      | core                   |
| WP_019044571.1                                                         | <i>crp</i>       | core                   |
| WP_011206895.1                                                         | <i>cspA_2</i>    | core                   |
| WP_086006611.1                                                         | <i>cysD_2</i>    | core                   |
| WP_083899709.1                                                         | <i>dnaB</i>      | core                   |
| WP_043689317.1                                                         | <i>ftsZ</i>      | core                   |
| WP_028479292.1                                                         | <i>groS</i>      | core                   |
| WP_083899637.1                                                         | NA               | core                   |
| WP_040783886.1                                                         | NA               | core                   |
| WP_043693618.1                                                         | NA               | core                   |
| WP_085994820.1                                                         | NA               | core                   |
| WP_174377715.1                                                         | <i>ilvC</i>      | core                   |
| WP_039799659.1                                                         | <i>ilvH</i>      | core                   |
| WP_011207082.1                                                         | <i>mbtH_2</i>    | core                   |
| WP_043695871.1                                                         | <i>nrdF2</i>     | core                   |
| WP_040777220.1                                                         | <i>pdtA</i>      | core                   |
| WP_043694364.1                                                         | <i>pdxS</i>      | core                   |
| WP_043686699.1                                                         | <i>radD</i>      | core                   |
| WP_043685451.1                                                         | <i>recR</i>      | core                   |
| WP_043688208.1                                                         | <i>rho</i>       | core                   |
| WP_043687358.1                                                         | <i>rplE</i>      | core                   |
| WP_039795505.1                                                         | <i>rplN</i>      | core                   |
| WP_039797323.1                                                         | <i>rplT</i>      | core                   |
| WP_043688634.1                                                         | <i>rpmA</i>      | core                   |
| WP_011211653.1                                                         | <i>rpmG2_2</i>   | core                   |
| WP_043689602.1                                                         | <i>rpsA</i>      | core                   |
| WP_043687383.1                                                         | <i>rpsE</i>      | core                   |
| WP_039795549.1                                                         | <i>rpsH</i>      | core                   |
| WP_174377687.1                                                         | <i>uvrB</i>      | core                   |
| WP_011211115.1                                                         | <i>whiB1</i>     | core                   |
| WP_029901515.1                                                         | <i>whiB2</i>     | core                   |
| WP_043688075.1                                                         | <i>accD5_2</i>   | core                   |
| WP_043699134.1                                                         | <i>aceA</i>      | core                   |
| WP_039796380.1                                                         | <i>clpS</i>      | core                   |
| WP_043699871.1                                                         | <i>dcd</i>       | core                   |
| WP_011207048.1                                                         | <i>espR_2</i>    | core                   |
| WP_043698829.1                                                         | <i>fusA</i>      | core                   |

|                |                |      |
|----------------|----------------|------|
| WP_039799550.1 | <i>glnB</i>    | core |
| WP_040708791.1 | NA             | core |
| WP_039795739.1 | NA             | core |
| WP_011210678.1 | NA             | core |
| WP_011211259.1 | NA             | core |
| WP_040864988.1 | <i>icd</i>     | core |
| WP_003418601.1 | <i>infA</i>    | core |
| WP_083887487.1 | <i>infC</i>    | core |
| WP_043697976.1 | <i>mprA_1</i>  | core |
| WP_174315456.1 | <i>mtrA</i>    | core |
| WP_043699045.1 | <i>nasF</i>    | core |
| WP_043687244.1 | <i>rplB</i>    | core |
| WP_043698934.1 | <i>rplK</i>    | core |
| WP_040864842.1 | <i>rplP</i>    | core |
| WP_011210681.1 | <i>rplS</i>    | core |
| WP_011207266.1 | <i>rplW</i>    | core |
| WP_043698893.1 | <i>rpoC</i>    | core |
| WP_039798918.1 | <i>rpoZ</i>    | core |
| WP_043695197.1 | <i>rpsB</i>    | core |
| WP_030525248.1 | <i>rpsG</i>    | core |
| WP_003938093.1 | <i>rpsJ</i>    | core |
| WP_014981768.1 | <i>rpsK</i>    | core |
| WP_040870256.1 | <i>rpsL</i>    | core |
| WP_014981705.1 | <i>rpsZ</i>    | core |
| WP_043694466.1 | <i>sigA</i>    | core |
| WP_043694545.1 | <i>sigB</i>    | core |
| WP_043700355.1 | <i>ssb_1</i>   | core |
| WP_040782761.1 | <i>sucD</i>    | core |
| WP_043686740.1 | <i>walR</i>    | core |
| WP_043693711.1 | <i>whiA</i>    | core |
| WP_043699579.1 | <i>dnaK_1</i>  | core |
| WP_043699706.1 | <i>groL1</i>   | core |
| WP_043694830.1 | NA             | core |
| WP_040696222.1 | NA             | core |
| WP_043689200.1 | NA             | core |
| WP_039799153.1 | NA             | core |
| WP_043700314.1 | <i>ino1</i>    | core |
| WP_174186519.1 | <i>pafA</i>    | core |
| WP_043694706.1 | <i>recA</i>    | core |
| WP_043699059.1 | <i>regX3_2</i> | core |
| WP_043687917.1 | <i>ricR</i>    | core |
| WP_011210730.1 | <i>rpmB_2</i>  | core |
| WP_039796334.1 | <i>rpmE</i>    | core |
| WP_039796155.1 | <i>rpoA</i>    | core |

|                |                |      |
|----------------|----------------|------|
| WP_043687550.1 | <i>rpsM</i>    | core |
| WP_011211513.1 | <i>rpsR1</i>   | core |
| WP_043687250.1 | <i>rpsS</i>    | core |
| WP_043698828.1 | <i>tuf</i>     | core |
| WP_043699980.1 | <i>aspC_1</i>  | core |
| WP_043686633.1 | <i>pstB1</i>   | core |
| WP_043688437.1 | <i>rph</i>     | core |
| WP_040864865.1 | <i>rplX</i>    | core |
| WP_019049259.1 | <i>rpmG2_1</i> | core |
| WP_043687258.1 | <i>rpsC</i>    | core |
| WP_028476708.1 | NA             | core |
| WP_043698986.1 | <i>menB</i>    | core |
| WP_043695887.1 | <i>nrpE1</i>   | core |
| WP_043693088.1 | <i>arc</i>     | core |
| WP_043689484.1 | <i>bioB</i>    | core |
| WP_043688091.1 | <i>purE</i>    | core |
| WP_043693149.1 | <i>rsbRA</i>   | core |
| WP_043698018.1 | <i>sucC</i>    | core |
| WP_043687553.1 | <i>rpsD</i>    | core |
| WP_043699502.1 | <i>purA</i>    | core |
| NA             | <i>rpoB</i>    | core |
| WP_043696209.1 | <i>smpB</i>    | core |
| WP_043697694.1 | <i>greA</i>    | core |

---
