# Supplementary material for: Whole genome sequencing reveals the genomic diversity, taxonomic classification, and evolutionary relationships of the genus Nocardia
Source: PubMed Central journal article supplement (PMC8437295; doi:10.1371/journal.pntd.0009665), 2021-08-26
Supplement: pntd.0009665.s003.pdf [file pntd.0009665.s003.pdf]

**S3 Table.** Complete list of the 384 single copy genes.

| <b>Protein accession</b> | <b>Gene</b>  | <b>RFD</b> | <b>Branch congruence measure</b> | <b><math>\pi</math></b> | <b>Description</b>                                                        |
|--------------------------|--------------|------------|----------------------------------|-------------------------|---------------------------------------------------------------------------|
| <b>number in</b>         | <b>name</b>  |            | <b>(%)</b>                       |                         |                                                                           |
| <i>N. abscessus</i>      |              |            |                                  |                         |                                                                           |
| <b>NBRC 100374</b>       |              |            |                                  |                         |                                                                           |
| WP_083899681.1           | NA           | 34         | 0.76                             | 0.309                   | prolyl oligopeptidase family serine peptidase                             |
| WP_043696244.1           | <i>mngC</i>  | 34         | 0.76                             | 0.276                   | Acyl-CoA dehydrogenase                                                    |
| WP_043695513.1           | <i>ppk</i>   | 36         | 0.77                             | 0.305                   | Polyphosphate kinase                                                      |
| WP_043685774.1           | <i>topA</i>  | 36         | 0.77                             | 0.295                   | DNA topoisomerase                                                         |
| WP_043699045.1           | <i>cysG</i>  | 36         | 0.77                             | 0.283                   | Siroheme synthase                                                         |
| WP_043700493.1           | NA           | 36         | 0.74                             | 0.33                    | putative ABC transporter                                                  |
| WP_043699130.1           | <i>metE</i>  | 38         | 0.88                             | 0.313                   | 5-methyltetrahydropteroyltriglutamate--homocysteine methyltransferase     |
| WP_051169005.1           | <i>ndh</i>   | 40         | 0.72                             | 0.32                    | NADH dehydrogenase                                                        |
| WP_043686035.1           | NA           | 42         | 0.73                             | 0.338                   | trehalose-phosphatase                                                     |
| WP_043694756.1           | <i>ftsK</i>  | 42         | 0.73                             | 0.303                   | DNA translocase                                                           |
| WP_051169366.1           | <i>hemL</i>  | 42         | 0.73                             | 0.303                   | Glutamate-1-semialdehyde 2,1-aminomutase                                  |
| WP_043700199.1           | <i>leuS</i>  | 42         | 0.73                             | 0.285                   | Leucine--tRNA ligase                                                      |
| WP_051168648.1           | <i>folC</i>  | 42         | 0.72                             | 0.303                   | Dihydrofolate synthase                                                    |
| WP_043685249.1           | NA           | 42         | 0.71                             | 0.309                   | Fatty acid ABC transporter                                                |
| WP_043692156.1           | <i>mshC</i>  | 42         | 0.7                              | 0.316                   | L-cysteine:1D-myo-inositol 2-amino-2-deoxy-alpha-D-glucopyranoside ligase |
| WP_157229694.1           | <i>nuoG</i>  | 42         | 0.7                              | 0.313                   | NADH-quinone oxidoreductase subunit G                                     |
| WP_043689770.1           | <i>menE</i>  | 44         | 0.86                             | 0.325                   | 2-succinylbenzoate--CoA ligase                                            |
| WP_043697332.1           | <i>glgC</i>  | 44         | 0.72                             | 0.31                    | Glucose-1-phosphate adenylyltransferase                                   |
| WP_043685900.1           | <i>lysSI</i> | 44         | 0.71                             | 0.312                   | Lysine--tRNA ligase 1                                                     |
| WP_043685154.1           | NA           | 44         | 0.71                             | 0.31                    | cysteine desulfurase-like protein                                         |
| WP_043699618.1           | NA           | 44         | 0.71                             | 0.31                    | HAD-IB family hydrolase                                                   |
| WP_043699464.1           | <i>pta</i>   | 44         | 0.7                              | 0.319                   | Phosphate acetyltransferase                                               |
| WP_043695811.1           | NA           | 44         | 0.7                              | 0.315                   | Glycogen synthase                                                         |
| WP_043694528.1           | NA           | 44         | 0.69                             | 0.304                   | DEAD/DEAH box helicase                                                    |
| WP_174377743.1           | NA           | 46         | 0.84                             | 0.306                   | HAMP domain-containing protein                                            |
| WP_051169086.1           | <i>hflX</i>  | 46         | 0.71                             | 0.302                   | GTPase HflX                                                               |
| WP_174377687.1           | <i>uvrB</i>  | 46         | 0.71                             | 0.296                   | UvrABC system protein B                                                   |
| WP_043689634.1           | <i>uvrA</i>  | 46         | 0.71                             | 0.293                   | UvrABC system protein A                                                   |
| WP_043685381.1           | NA           | 46         | 0.71                             | 0.288                   | Putative aminotransferase                                                 |
| WP_043697701.1           | <i>cbs</i>   | 46         | 0.71                             | 0.281                   | Putative cystathionine beta-synthase                                      |
| WP_086006697.1           | NA           | 46         | 0.7                              | 0.311                   | acyltransferase                                                           |
| WP_043688567.1           | <i>pepN</i>  | 46         | 0.7                              | 0.301                   | Aminopeptidase N                                                          |
| WP_043687657.1           | <i>glmS</i>  | 46         | 0.7                              | 0.285                   | Glutamine--fructose-6-phosphate aminotransferase                          |
| WP_043687634.1           | NA           | 46         | 0.69                             | 0.326                   | ABC transporter                                                           |
| WP_043685622.1           | <i>mtgA</i>  | 46         | 0.69                             | 0.318                   | Biosynthetic peptidoglycan transglycosylase                               |
| WP_043697400.1           | <i>fbiC</i>  | 46         | 0.69                             | 0.313                   | FO synthase                                                               |

|                |              |    |      |       |                                                             |
|----------------|--------------|----|------|-------|-------------------------------------------------------------|
| WP_043697624.1 | <i>fumC</i>  | 46 | 0.68 | 0.328 | Fumarate hydratase class II                                 |
| WP_043688748.1 | NA           | 46 | 0.68 | 0.318 | HlyC/CorC family transporter                                |
| WP_043692891.1 | <i>cobN</i>  | 46 | 0.68 | 0.306 | Aerobic cobaltochelatae subunit CobN                        |
| WP_043689536.1 | <i>ilvA</i>  | 46 | 0.68 | 0.298 | L-threonine dehydratase biosynthetic IlvA                   |
| WP_043684896.1 | <i>embB</i>  | 46 | 0.67 | 0.309 | putative arabinosyltransferase B                            |
| WP_043688262.1 | <i>glgE</i>  | 46 | 0.67 | 0.306 | Alpha-1,4-glucan:maltose-1-phosphate<br>maltosyltransferase |
| WP_043686561.1 | <i>dapB1</i> | 48 | 0.85 | 0.261 | Dipeptidyl aminopeptidase BI                                |
| WP_083899718.1 | <i>lon</i>   | 48 | 0.84 | 0.287 | Lon protease                                                |
| WP_043693099.1 | <i>metH</i>  | 48 | 0.7  | 0.285 | Methionine synthase                                         |
| WP_043688201.1 | <i>argS</i>  | 48 | 0.69 | 0.305 | Arginine--tRNA ligase                                       |
| WP_043697784.1 | <i>mfd</i>   | 48 | 0.69 | 0.3   | Transcription-repair-coupling factor                        |
| WP_043696400.1 | <i>pgm</i>   | 48 | 0.69 | 0.299 | Phosphoglucomutase                                          |
| WP_043695237.1 | <i>yhgF</i>  | 48 | 0.69 | 0.288 | Protein YhgF                                                |
| WP_043685835.1 | <i>dltA</i>  | 48 | 0.68 | 0.333 | D-alanine--D-alanyl carrier protein ligase                  |
| WP_043699061.1 | <i>sasA</i>  | 48 | 0.68 | 0.312 | Adaptive-response sensory-kinase                            |
| WP_043696736.1 | <i>pdtaS</i> | 48 | 0.67 | 0.323 | putative sensor histidine kinase                            |
| WP_174377666.1 | <i>deoA</i>  | 48 | 0.67 | 0.321 | Thymidine phosphorylase                                     |
| WP_043688990.1 | NA           | 48 | 0.67 | 0.32  | helix-turn-helix domain-containing protein                  |
| WP_043685247.1 | NA           | 48 | 0.67 | 0.318 | putative ABC transporter                                    |
| WP_043688272.1 | <i>dinG</i>  | 48 | 0.67 | 0.315 | putative ATP-dependent helicase                             |
| WP_043697950.1 | <i>moeA1</i> | 48 | 0.67 | 0.307 | Molybdopterin molybdenumtransferase 1                       |
| WP_043699575.1 | <i>dnaJ1</i> | 48 | 0.67 | 0.297 | Chaperone protein DnaJ 1                                    |
| WP_043688260.1 | <i>glgB</i>  | 48 | 0.66 | 0.316 | 1,4-alpha-glucan branching enzyme                           |
| WP_043697629.1 | NA           | 48 | 0.66 | 0.315 | PhoH family protein                                         |
| WP_043693849.1 | <i>pyrC</i>  | 48 | 0.66 | 0.303 | Dihydroorotase                                              |
| WP_043688778.1 | <i>dnaG</i>  | 48 | 0.66 | 0.3   | DNA primase                                                 |
| WP_043700394.1 | NA           | 48 | 0.66 | 0.268 | ABC transporter substrate-binding protein                   |
| WP_043695332.1 | <i>frr</i>   | 50 | 0.83 | 0.296 | Ribosome-recycling factor                                   |
| WP_043696697.1 | <i>moeZ</i>  | 50 | 0.83 | 0.278 | adenylyltransferase/sulfurtransferase                       |
| WP_043696894.1 | <i>algC</i>  | 50 | 0.68 | 0.316 | Phosphomannomutase/phosphoglucomutase                       |
| WP_083899274.1 | <i>polA</i>  | 50 | 0.68 | 0.313 | DNA polymerase I                                            |
| WP_043697326.1 | <i>mrp</i>   | 50 | 0.68 | 0.292 | Iron-sulfur cluster carrier protein                         |
| WP_043693088.1 | <i>arc</i>   | 50 | 0.68 | 0.286 | Proteasome-associated ATPase                                |
| WP_043686502.1 | <i>purL</i>  | 50 | 0.68 | 0.269 | Phosphoribosylformylglycinamide<br>synthase                 |
| WP_043688202.1 | <i>lysA</i>  | 50 | 0.67 | 0.294 | Diaminopimelate decarboxylase                               |
| WP_043684743.1 | <i>serS</i>  | 50 | 0.67 | 0.29  | Serine--tRNA ligase                                         |
| WP_174377697.1 | <i>dapE</i>  | 50 | 0.67 | 0.285 | Succinyl-diaminopimelate desuccinylase                      |
| WP_043686010.1 | <i>radA</i>  | 50 | 0.66 | 0.32  | DNA repair protein RadA                                     |
| WP_043697651.1 | NA           | 50 | 0.66 | 0.32  | hypothetical protein                                        |
| WP_043694444.1 | <i>kimA</i>  | 50 | 0.66 | 0.31  | Potassium transporter KimA                                  |
| WP_043698038.1 | <i>uvrD1</i> | 50 | 0.66 | 0.303 | ATP-dependent DNA helicase UvrD1                            |
| WP_043689746.1 | <i>argJ</i>  | 50 | 0.66 | 0.294 | Arginine biosynthesis bifunctional protein                  |

|                |              |    |      |       |                                                                       |
|----------------|--------------|----|------|-------|-----------------------------------------------------------------------|
| WP_174377695.1 | <i>nuoD</i>  | 50 | 0.65 | 0.288 | NADH-quinone oxidoreductase subunit D                                 |
| WP_169334193.1 | <i>gmk</i>   | 52 | 0.82 | 0.322 | Guanylate kinase                                                      |
| WP_043697370.1 | <i>dapD</i>  | 52 | 0.82 | 0.305 | 2,3,4,5-tetrahydropyridine-2,6-dicarboxylate<br>N-succinyltransferase |
| WP_043685134.1 | <i>glfT2</i> | 52 | 0.67 | 0.32  | Galactofuranosyltransferase GlfT2                                     |
| WP_043697614.1 | <i>glpX</i>  | 52 | 0.67 | 0.281 | Fructose-1,6-bisphosphatase class 2                                   |
| WP_043692966.1 | <i>dop</i>   | 52 | 0.67 | 0.275 | Pup deamidase/depupylase                                              |
| WP_157229688.1 | <i>secA1</i> | 52 | 0.67 | 0.26  | Protein translocase subunit SecA 1                                    |
| WP_051168438.1 | NA           | 52 | 0.66 | 0.312 | FAD-binding oxidoreductase                                            |
| WP_043699206.1 | <i>ramB</i>  | 52 | 0.66 | 0.311 | HTH-type transcriptional regulator                                    |
| WP_043693670.1 | <i>tkt</i>   | 52 | 0.66 | 0.271 | Transketolase                                                         |
| WP_043684435.1 | <i>pknB</i>  | 52 | 0.65 | 0.35  | Serine/threonine-protein kinase                                       |
| WP_043687599.1 | <i>eccC</i>  | 52 | 0.65 | 0.322 | ESX secretion system protein                                          |
| WP_043689046.1 | <i>glnE</i>  | 52 | 0.65 | 0.307 | Bifunctional glutamine synthetase<br>adenylyltransferase              |
| WP_051169285.1 | NA           | 52 | 0.64 | 0.324 | EAL domain-containing protein                                         |
| WP_043697695.1 | <i>metB</i>  | 52 | 0.64 | 0.313 | Cystathionine gamma-synthase                                          |
| WP_043695755.1 | <i>ligA</i>  | 52 | 0.64 | 0.301 | DNA ligase A                                                          |
| WP_043699448.1 | <i>btuD</i>  | 52 | 0.63 | 0.312 | Vitamin B12 import ATP-binding protein                                |
| WP_040865365.1 | NA           | 52 | 0.63 | 0.304 | TetR family transcriptional regulator                                 |
| WP_043685860.1 | <i>gltC</i>  | 52 | 0.63 | 0.299 | HTH-type transcriptional regulator                                    |
| WP_051168722.1 | <i>pheS</i>  | 52 | 0.63 | 0.286 | Phenylalanine--tRNA ligase alpha subunit                              |
| WP_086006622.1 | <i>pyk</i>   | 54 | 0.65 | 0.304 | Pyruvate kinase                                                       |
| WP_043686458.1 | <i>purB</i>  | 54 | 0.65 | 0.288 | Adenylosuccinate lyase                                                |
| WP_043699502.1 | <i>purA</i>  | 54 | 0.65 | 0.282 | Adenylosuccinate synthetase                                           |
| WP_083899251.1 | <i>ctaC</i>  | 54 | 0.65 | 0.279 | Cytochrome c oxidase subunit 2                                        |
| WP_043699749.1 | NA           | 54 | 0.65 | 0.274 | Acyl-CoA dehydrogenase fadE12                                         |
| WP_043690243.1 | NA           | 54 | 0.64 | 0.321 | HlyC/CorC family transporter                                          |
| WP_043689852.1 | <i>der</i>   | 54 | 0.64 | 0.314 | GTPase Der                                                            |
| WP_043694562.1 | NA           | 54 | 0.64 | 0.31  | DEAD/DEAH box helicase                                                |
| WP_051168778.1 | <i>gcvP</i>  | 54 | 0.64 | 0.309 | putative glycine dehydrogenase                                        |
| WP_043697796.1 | <i>glmU</i>  | 54 | 0.64 | 0.308 | Bifunctional protein                                                  |
| WP_043690683.1 | NA           | 54 | 0.64 | 0.294 | SDR family oxidoreductase                                             |
| WP_043693348.1 | NA           | 54 | 0.64 | 0.292 | coenzyme F420-dependent oxidoreductase                                |
| WP_043687596.1 | <i>eccD5</i> | 54 | 0.63 | 0.306 | ESX-5 secretion system protein                                        |
| WP_051168435.1 | <i>tgt</i>   | 54 | 0.61 | 0.292 | Queuine tRNA-ribosyltransferase                                       |
| WP_043684840.1 | NA           | 56 | 0.81 | 0.295 | Putative peptide transport permease protein                           |
| WP_043685876.1 | <i>ftsH</i>  | 56 | 0.65 | 0.257 | ATP-dependent zinc metalloprotease                                    |
| WP_043698046.1 | <i>pgi</i>   | 56 | 0.64 | 0.3   | Glucose-6-phosphate isomerase                                         |
| WP_051168485.1 | <i>otsA</i>  | 56 | 0.64 | 0.297 | Trehalose-6-phosphate synthase                                        |
| WP_043687877.1 | NA           | 56 | 0.64 | 0.291 | hypothetical protein                                                  |
| WP_043689564.1 | <i>trpC</i>  | 56 | 0.64 | 0.29  | Indole-3-glycerol phosphate synthase                                  |
| WP_043688667.1 | <i>tig</i>   | 56 | 0.64 | 0.272 | Trigger factor                                                        |
| WP_043688724.1 | <i>fprB</i>  | 56 | 0.63 | 0.329 | putative ferredoxin                                                   |

|                |              |    |      |       |                                                       |
|----------------|--------------|----|------|-------|-------------------------------------------------------|
| WP_169334154.1 | <i>fadD3</i> | 56 | 0.63 | 0.325 | CoA ligase                                            |
| WP_043689786.1 | <i>tyrS</i>  | 56 | 0.63 | 0.324 | Tyrosine--tRNA ligase                                 |
| WP_043700485.1 | <i>sdhA</i>  | 56 | 0.63 | 0.315 | Succinate dehydrogenase flavoprotein                  |
| WP_043686516.1 | <i>purF</i>  | 56 | 0.63 | 0.312 | Amidophosphoribosyltransferase                        |
| WP_043700203.1 | NA           | 56 | 0.63 | 0.312 | hypothetical protein                                  |
| WP_043686050.1 | NA           | 56 | 0.63 | 0.309 | lipid-transfer protein                                |
| WP_043689562.1 | <i>trpE</i>  | 56 | 0.63 | 0.303 | Anthranilate synthase component 1                     |
| WP_043688232.1 | <i>murA</i>  | 56 | 0.62 | 0.336 | UDP-N-acetylglucosamine 1-<br>carboxyvinyltransferase |
| WP_043684354.1 | <i>yidC</i>  | 56 | 0.62 | 0.31  | Membrane protein insertase                            |
| WP_043689172.1 | <i>pepA</i>  | 56 | 0.62 | 0.307 | putative cytosol aminopeptidase                       |
| WP_043686047.1 | NA           | 56 | 0.62 | 0.284 | Acyl-CoA dehydrogenase FadE29                         |
| WP_083899478.1 | <i>aftC</i>  | 56 | 0.61 | 0.322 | Alpha-(1->3)-arabinofuranosyltransferase              |
| WP_043685625.1 | NA           | 56 | 0.61 | 0.316 | ArsA family ATPase                                    |
| WP_043688017.1 | <i>scmP</i>  | 56 | 0.61 | 0.312 | N-acetylcysteine deacetylase                          |
| WP_043694282.1 | NA           | 56 | 0.61 | 0.306 | Phosphatidylinositol phosphate synthase               |
| WP_086006729.1 | NA           | 56 | 0.61 | 0.286 | hypothetical protein                                  |
| WP_043689398.1 | NA           | 56 | 0.6  | 0.319 | putative RNA pseudouridine synthase                   |
| WP_043686215.1 | NA           | 58 | 0.81 | 0.316 | Putative acyl-CoA dehydrogenase FadE17                |
| WP_043699247.1 | <i>lpdC</i>  | 58 | 0.81 | 0.256 | Dihydrolipoyl dehydrogenase                           |
| WP_051168500.1 | NA           | 58 | 0.8  | 0.339 | DUF3071 domain-containing protein                     |
| WP_043684511.1 | <i>gltD</i>  | 58 | 0.63 | 0.259 | Glutamate synthase [NADPH] small chain                |
| WP_043694934.1 | <i>pnp</i>   | 58 | 0.63 | 0.253 | Polyribonucleotide nucleotidyltransferase             |
| WP_043691023.1 | <i>nuoL</i>  | 58 | 0.62 | 0.323 | NADH-quinone oxidoreductase subunit L                 |
| WP_086006780.1 | <i>nuoM</i>  | 58 | 0.62 | 0.313 | NADH-quinone oxidoreductase subunit M                 |
| WP_174377710.1 | <i>rnj</i>   | 58 | 0.62 | 0.294 | Ribonuclease J                                        |
| WP_039798216.1 | NA           | 58 | 0.62 | 0.288 | DUF3090 domain-containing protein                     |
| WP_043693674.1 | <i>zwf2</i>  | 58 | 0.62 | 0.288 | Glucose-6-phosphate 1-dehydrogenase 2                 |
| WP_043693840.1 | <i>carB</i>  | 58 | 0.62 | 0.279 | Carbamoyl-phosphate synthase large chain              |
| WP_043688075.1 | <i>accD5</i> | 58 | 0.62 | 0.249 | putative propionyl-CoA carboxylase beta<br>chain 5    |
| WP_043694034.1 | <i>aroC</i>  | 58 | 0.61 | 0.316 | Chorismate synthase                                   |
| WP_043695388.1 | NA           | 58 | 0.61 | 0.314 | chromosome segregation protein SMC                    |
| WP_043689835.1 | <i>pyrG</i>  | 58 | 0.61 | 0.309 | CTP synthase                                          |
| WP_043688210.1 | <i>prfA</i>  | 58 | 0.61 | 0.298 | Peptide chain release factor 1                        |
| WP_086006598.1 | <i>purK</i>  | 58 | 0.6  | 0.317 | N5-carboxyaminoimidazole ribonucleotide<br>synthase   |
| WP_043690194.1 | NA           | 58 | 0.6  | 0.314 | acyl-CoA dehydrogenase family protein                 |
| WP_086006663.1 | NA           | 58 | 0.6  | 0.314 | putative AAA domain-containing protein                |
| WP_043688744.1 | <i>dnaJ2</i> | 58 | 0.6  | 0.3   | Chaperone protein                                     |
| WP_043689528.1 | <i>hisF</i>  | 58 | 0.6  | 0.296 | Imidazole glycerol phosphate synthase<br>subunit      |
| WP_051169357.1 | <i>hepT</i>  | 58 | 0.6  | 0.285 | Heptaprenyl diphosphate synthase<br>component         |

|                |              |    |      |       |                                                                           |
|----------------|--------------|----|------|-------|---------------------------------------------------------------------------|
| WP_043699333.1 | <i>nuoL</i>  | 58 | 0.59 | 0.344 | NADH-quinone oxidoreductase subunit L                                     |
| WP_043694274.1 | <i>tesB</i>  | 58 | 0.59 | 0.311 | Acyl-CoA thioesterase 2                                                   |
| WP_174377696.1 | <i>nuoC</i>  | 58 | 0.59 | 0.308 | NADH-quinone oxidoreductase subunit C                                     |
| WP_043688530.1 | <i>orn</i>   | 58 | 0.59 | 0.297 | Oligoribonuclease                                                         |
| WP_043689177.1 | <i>ilvE</i>  | 58 | 0.59 | 0.296 | Branched-chain-amino-acid<br>aminotransferase                             |
| WP_043686360.1 | NA           | 58 | 0.59 | 0.291 | 3-oxocholest-4-en-26-oate--CoA ligase                                     |
| WP_043693706.1 | <i>pgk</i>   | 58 | 0.59 | 0.281 | Phosphoglycerate kinase                                                   |
| WP_043685144.1 | <i>tagH</i>  | 60 | 0.81 | 0.315 | Teichoic acids export ATP-binding protein                                 |
| WP_043697127.1 | <i>deaD</i>  | 60 | 0.62 | 0.304 | ATP-dependent RNA helicase                                                |
| WP_043692933.1 | <i>hely</i>  | 60 | 0.62 | 0.303 | putative helicase                                                         |
| WP_043694117.1 | <i>alaS</i>  | 60 | 0.62 | 0.282 | Alanine--tRNA ligase                                                      |
| WP_043689044.1 | <i>glnA2</i> | 60 | 0.62 | 0.281 | Glutamine synthetase                                                      |
| WP_086006710.1 | <i>metG</i>  | 60 | 0.62 | 0.274 | Methionine--tRNA ligase                                                   |
| WP_043685491.1 | <i>leuA</i>  | 60 | 0.62 | 0.254 | 2-isopropylmalate synthase                                                |
| WP_086006727.1 | <i>tldD</i>  | 60 | 0.61 | 0.308 | Metalloprotease                                                           |
| WP_043695061.1 | <i>mgo</i>   | 60 | 0.61 | 0.302 | putative malate:quinone oxidoreductase                                    |
| WP_083899255.1 | <i>qcrC</i>  | 60 | 0.61 | 0.294 | Cytochrome bc1 complex cytochrome c<br>subunit                            |
| WP_043685439.1 | NA           | 60 | 0.61 | 0.29  | putative fatty acid methyltransferase                                     |
| WP_043695674.1 | <i>gata</i>  | 60 | 0.61 | 0.287 | Glutamyl-tRNA(Gln) amidotransferase<br>subunit A                          |
| WP_083899151.1 | <i>guaB</i>  | 60 | 0.61 | 0.284 | Inosine-5'-monophosphate dehydrogenase                                    |
| WP_043695018.1 | <i>nusA</i>  | 60 | 0.61 | 0.281 | Transcription termination/<br>antitermination protein                     |
| WP_043696645.1 | <i>nasD</i>  | 60 | 0.61 | 0.26  | Nitrite reductase                                                         |
| WP_043695541.1 | <i>leuB</i>  | 60 | 0.6  | 0.269 | 3-isopropylmalate dehydrogenase                                           |
| WP_043687896.1 | <i>lpdA</i>  | 60 | 0.58 | 0.313 | NAD(P)H dehydrogenase                                                     |
| WP_043686520.1 | <i>purM</i>  | 60 | 0.58 | 0.305 | Phosphoribosylformylglycinamidine<br>cyclo-ligase                         |
| WP_043691073.1 | <i>nuoB</i>  | 60 | 0.58 | 0.304 | NADH-quinone oxidoreductase subunit B                                     |
| WP_043686699.1 | NA           | 62 | 0.8  | 0.32  | DEAD/DEAH box helicase                                                    |
| WP_043700026.1 | <i>hcaB</i>  | 62 | 0.8  | 0.276 | 3-phenylpropionate-dihydrodiol/cinnamic<br>acid-dihydrodiol dehydrogenase |
| WP_043688750.1 | <i>era</i>   | 62 | 0.79 | 0.279 | GTPase Era                                                                |
| WP_086006615.1 | <i>aceE</i>  | 62 | 0.61 | 0.28  | Pyruvate dehydrogenase E1 component                                       |
| WP_043688253.1 | NA           | 62 | 0.6  | 0.313 | hypothetical protein                                                      |
| WP_043698004.1 | <i>purH</i>  | 62 | 0.6  | 0.309 | Bifunctional purine biosynthesis protein                                  |
| WP_043684864.1 | <i>glfT2</i> | 62 | 0.6  | 0.286 | Galactofuranosyltransferase                                               |
| WP_043684752.1 | NA           | 62 | 0.6  | 0.278 | Putative Rieske 2Fe-2S iron-sulfur protein                                |
| WP_043698893.1 | <i>rpoC</i>  | 62 | 0.6  | 0.24  | DNA-directed RNA polymerase subunit beta                                  |
| WP_043688692.1 | <i>proA</i>  | 62 | 0.59 | 0.303 | Gamma-glutamyl phosphate reductase                                        |
| WP_043685537.1 | <i>asd</i>   | 62 | 0.59 | 0.287 | Aspartate-semialdehyde dehydrogenase                                      |
| WP_043693703.1 | <i>tpiA</i>  | 62 | 0.59 | 0.272 | Triosephosphate isomerase                                                 |

|                |              |    |      |       |                                                               |
|----------------|--------------|----|------|-------|---------------------------------------------------------------|
| WP_051169146.1 | <i>ndh</i>   | 62 | 0.58 | 0.292 | NADH dehydrogenase                                            |
| WP_043695076.1 | <i>map</i>   | 62 | 0.58 | 0.281 | Methionine aminopeptidase 2                                   |
| WP_043686644.1 | <i>dus</i>   | 62 | 0.57 | 0.318 | putative tRNA-dihydrouridine synthase                         |
| WP_043694623.1 | <i>lexA</i>  | 62 | 0.56 | 0.331 | LexA repressor                                                |
| WP_043686743.1 | <i>phoU2</i> | 62 | 0.56 | 0.299 | Phosphate-specific transport system<br>accessory protein      |
| WP_043699540.1 | <i>fabH</i>  | 62 | 0.56 | 0.298 | 3-oxoacyl-[acyl-carrier-protein] synthase 3                   |
| WP_051168471.1 | NA           | 64 | 0.79 | 0.29  | Putative enoyl-CoA hydratase EchA13                           |
| WP_083899527.1 | <i>gatB</i>  | 64 | 0.59 | 0.275 | Aspartyl/glutamyl-tRNA(Asn/Gln)<br>amidotransferase subunit B |
| WP_043684862.1 | <i>glf</i>   | 64 | 0.59 | 0.27  | UDP-galactopyranose mutase                                    |
| WP_043695803.1 | <i>etfA</i>  | 64 | 0.59 | 0.257 | Electron transfer flavoprotein subunit alpha                  |
| WP_043690371.1 | <i>mutB</i>  | 64 | 0.59 | 0.246 | putative methylmalonyl-CoA mutase large<br>subunit            |
| WP_043685147.1 | NA           | 64 | 0.58 | 0.327 | ABC transporter permease                                      |
| WP_043686876.1 | <i>citA</i>  | 64 | 0.58 | 0.306 | Putative citrate synthase 2                                   |
| WP_083899464.1 | <i>ctaB</i>  | 64 | 0.58 | 0.297 | Protoheme IX farnesyltransferase                              |
| WP_043689123.1 | <i>lipA</i>  | 64 | 0.58 | 0.273 | Lipoyl synthase                                               |
| WP_043689651.1 | <i>pheT</i>  | 64 | 0.58 | 0.238 | Phenylalanine--tRNA ligase beta subunit                       |
| WP_043694554.1 | <i>ideR</i>  | 64 | 0.57 | 0.311 | Iron-dependent repressor                                      |
| WP_043690337.1 | <i>guaB1</i> | 64 | 0.57 | 0.31  | putative oxidoreductase                                       |
| WP_043694157.1 | NA           | 64 | 0.57 | 0.307 | hypothetical protein                                          |
| WP_043688534.1 | <i>fadH</i>  | 64 | 0.57 | 0.306 | 2,4-dienoyl-CoA reductase                                     |
| WP_043689521.1 | <i>hisC</i>  | 64 | 0.57 | 0.302 | Histidinol-phosphate aminotransferase                         |
| WP_043698178.1 | <i>acdA</i>  | 64 | 0.57 | 0.266 | Acyl-CoA dehydrogenase                                        |
| WP_043688949.1 | <i>ahpE</i>  | 64 | 0.57 | 0.25  | Alkyl hydroperoxide reductase E                               |
| WP_043699071.1 | <i>gpmA</i>  | 64 | 0.56 | 0.281 | 2,3-bisphosphoglycerate-dependent<br>phosphoglycerate mutase  |
| WP_043690208.1 | NA           | 64 | 0.55 | 0.302 | bifunctional nuclease family protein                          |
| WP_051168991.1 | <i>fumA</i>  | 66 | 0.58 | 0.278 | Fumarate hydratase class I, aerobic                           |
| WP_043697798.1 | <i>prs</i>   | 66 | 0.58 | 0.275 | Ribose-phosphate pyrophosphokinase                            |
| WP_039803160.1 | NA           | 66 | 0.58 | 0.271 | helix-turn-helix transcriptional regulator                    |
| WP_043694364.1 | <i>pdxS</i>  | 66 | 0.58 | 0.268 | Pyridoxal 5'-phosphate synthase subunit                       |
| WP_043684377.1 | <i>gyrA</i>  | 66 | 0.58 | 0.265 | DNA gyrase subunit A                                          |
| WP_083899118.1 | <i>gltA2</i> | 66 | 0.58 | 0.242 | Citrate synthase 1                                            |
| WP_083899588.1 | <i>kgd</i>   | 66 | 0.58 | 0.24  | Multifunctional 2-oxoglutarate metabolism<br>enzyme           |
| WP_043686827.1 | <i>serC</i>  | 66 | 0.57 | 0.293 | Phosphoserine aminotransferase                                |
| WP_043689279.1 | <i>aroG</i>  | 66 | 0.57 | 0.291 | Phospho-2-dehydro-3-deoxyheptonate<br>aldolase                |
| WP_043689340.1 | <i>qcrA</i>  | 66 | 0.57 | 0.283 | Cytochrome bc1 complex Rieske iron-sulfur<br>subunit          |
| WP_043694071.1 | <i>aspS</i>  | 66 | 0.57 | 0.269 | Aspartate--tRNA ligase                                        |
| WP_043694706.1 | <i>recA</i>  | 66 | 0.57 | 0.261 | recombinase RecA                                              |

|                |              |    |      |       |                                                                                           |
|----------------|--------------|----|------|-------|-------------------------------------------------------------------------------------------|
| WP_040864988.1 | <i>icd</i>   | 66 | 0.57 | 0.237 | Isocitrate dehydrogenase                                                                  |
| WP_157229656.1 | NA           | 66 | 0.55 | 0.336 | putative 1,4-alpha-glucan branching enzyme                                                |
| WP_043689789.1 | <i>argC</i>  | 66 | 0.55 | 0.301 | N-acetyl-gamma-glutamyl-phosphate reductase                                               |
| WP_169334158.1 | <i>dnaE2</i> | 66 | 0.54 | 0.316 | Error-prone DNA polymerase                                                                |
| WP_043693886.1 | <i>ypdF</i>  | 66 | 0.54 | 0.302 | Aminopeptidase                                                                            |
| WP_043693056.1 | <i>trml</i>  | 68 | 0.76 | 0.316 | tRNA (adenine(58)-N(1))-methyltransferase                                                 |
| WP_043695779.1 | <i>mnmA</i>  | 68 | 0.56 | 0.329 | tRNA-specific 2-thiouridylase MnmA                                                        |
| WP_043697819.1 | <i>prfC</i>  | 68 | 0.56 | 0.308 | Peptide chain release factor 3                                                            |
| WP_043697729.1 | <i>eno</i>   | 68 | 0.56 | 0.275 | Enolase                                                                                   |
| WP_043696447.1 | <i>prfB</i>  | 68 | 0.56 | 0.273 | Peptide chain release factor 2                                                            |
| WP_043699520.1 | <i>fba</i>   | 68 | 0.56 | 0.259 | Fructose-bisphosphate aldolase                                                            |
| WP_083899705.1 | <i>sugA</i>  | 68 | 0.55 | 0.299 | Trehalose transport system permease protein                                               |
| WP_043695032.1 | <i>proS</i>  | 68 | 0.55 | 0.273 | Proline--tRNA ligase                                                                      |
| WP_043687229.1 | <i>crtL</i>  | 68 | 0.54 | 0.33  | Lycopene beta cyclase                                                                     |
| WP_043686342.1 | NA           | 68 | 0.54 | 0.326 | thiolase domain-containing protein                                                        |
| WP_043695259.1 | <i>ffh</i>   | 68 | 0.54 | 0.272 | Signal recognition particle protein                                                       |
| WP_043689134.1 | <i>dlaT</i>  | 68 | 0.53 | 0.249 | Dihydrolipoyllysine-residue acetyltransferase component of pyruvate dehydrogenase complex |
| WP_043699047.1 | <i>hemA</i>  | 68 | 0.52 | 0.362 | Glutamyl-tRNA reductase                                                                   |
| WP_043689775.1 | <i>wecE</i>  | 68 | 0.52 | 0.315 | dTDP-4-amino-4,6-dideoxygalactose transaminase                                            |
| WP_043685128.1 | NA           | 68 | 0.52 | 0.29  | glycosyltransferase                                                                       |
| WP_043694150.1 | NA           | 70 | 0.55 | 0.307 | membrane protein                                                                          |
| WP_043700371.1 | NA           | 70 | 0.55 | 0.29  | Putative monooxygenase                                                                    |
| WP_043689499.1 | <i>nadA</i>  | 70 | 0.55 | 0.279 | Quinolinate synthase A                                                                    |
| WP_043689484.1 | <i>bioB</i>  | 70 | 0.55 | 0.266 | Biotin synthase                                                                           |
| WP_043686604.1 | NA           | 70 | 0.55 | 0.233 | Putative thiosulfate sulfurtransferase                                                    |
| WP_043695829.1 | <i>COQ5</i>  | 70 | 0.52 | 0.307 | 2-methoxy-6-polyprenyl-1,4-benzoquinol methylase, mitochondrial                           |
| WP_043688733.1 | <i>cysNC</i> | 70 | 0.51 | 0.303 | Bifunctional enzyme CysN/CysC                                                             |
| WP_043699605.1 | <i>hemB</i>  | 70 | 0.5  | 0.289 | Delta-aminolevulinic acid dehydratase                                                     |
| WP_043688721.1 | <i>sbpA</i>  | 70 | 0.49 | 0.276 | Sulfate-binding protein                                                                   |
| WP_043688668.1 | <i>clpX</i>  | 72 | 0.54 | 0.282 | ATP-dependent Clp protease subunit                                                        |
| WP_043694271.1 | NA           | 72 | 0.54 | 0.252 | putative transcriptional regulatory protein                                               |
| WP_043688958.1 | <i>accD6</i> | 72 | 0.53 | 0.3   | putative propionyl-CoA carboxylase beta chain 6                                           |
| WP_043694066.1 | NA           | 72 | 0.53 | 0.295 | kinase                                                                                    |
| WP_043693440.1 | NA           | 72 | 0.53 | 0.282 | SPFH/Band 7/PHB domain protein                                                            |
| WP_039796155.1 | <i>rpoA</i>  | 72 | 0.53 | 0.251 | RNA polymerase subunit alpha                                                              |
| WP_040780648.1 | <i>pyrH</i>  | 72 | 0.52 | 0.279 | Uridylate kinase                                                                          |
| WP_043693844.1 | <i>carA</i>  | 72 | 0.51 | 0.299 | Carbamoyl-phosphate synthase small chain                                                  |
| WP_043689630.1 | NA           | 72 | 0.51 | 0.293 | Universal stress protein                                                                  |

|                |              |    |      |       |                                                                                       |
|----------------|--------------|----|------|-------|---------------------------------------------------------------------------------------|
| WP_051169214.1 | NA           | 72 | 0.49 | 0.315 | sigma-70 family RNA polymerase sigma factor                                           |
| WP_043688208.1 | <i>rho</i>   | 74 | 0.53 | 0.277 | Transcription termination factor Rho                                                  |
| WP_043694380.1 | <i>thrS</i>  | 74 | 0.53 | 0.272 | Threonine--tRNA ligase                                                                |
| WP_083899664.1 | <i>nusG</i>  | 74 | 0.53 | 0.269 | Transcription termination/antitermination protein                                     |
| WP_043687244.1 | <i>rplB</i>  | 74 | 0.53 | 0.264 | 50S ribosomal protein L2                                                              |
| WP_043700314.1 | <i>ino1</i>  | 74 | 0.53 | 0.263 | Inositol-3-phosphate synthase                                                         |
| WP_043688551.1 | <i>ettA</i>  | 74 | 0.53 | 0.244 | Energy-dependent translational throttle protein                                       |
| WP_043695806.1 | <i>etfB</i>  | 74 | 0.53 | 0.232 | Electron transfer flavoprotein subunit beta                                           |
| WP_157229882.1 | <i>thiC</i>  | 74 | 0.52 | 0.287 | Phosphomethylpyrimidine synthase                                                      |
| WP_051168563.1 | <i>sdhA</i>  | 74 | 0.52 | 0.236 | Succinate dehydrogenase flavoprotein subunit                                          |
| WP_043685854.1 | <i>hpt</i>   | 74 | 0.51 | 0.272 | Hypoxanthine-guanine phosphoribosyltransferase                                        |
| WP_043689518.1 | <i>hisD</i>  | 74 | 0.5  | 0.289 | Histidinol dehydrogenase                                                              |
| WP_043691079.1 | <i>nuoA</i>  | 74 | 0.49 | 0.322 | NADH-quinone oxidoreductase subunit A                                                 |
| WP_086006612.1 | NA           | 74 | 0.49 | 0.289 | Trans,polycis-polyprenyl diphosphate synthase ((2Z,6E)-farnesyl diphosphate specific) |
| WP_043697488.1 | <i>ychF</i>  | 76 | 0.76 | 0.271 | Ribosome-binding ATPase YchF                                                          |
| WP_043692960.1 | <i>prcA1</i> | 76 | 0.74 | 0.321 | Proteasome subunit alpha 1                                                            |
| WP_043693560.1 | NA           | 76 | 0.51 | 0.269 | MoxR family ATPase                                                                    |
| WP_043690233.1 | <i>glcB</i>  | 76 | 0.51 | 0.243 | Malate synthase G                                                                     |
| WP_043688221.1 | <i>atpA</i>  | 76 | 0.51 | 0.233 | ATP synthase subunit alpha                                                            |
| WP_043687724.1 | <i>guaA</i>  | 76 | 0.5  | 0.291 | GMP synthase                                                                          |
| WP_043695194.1 | <i>tsf</i>   | 76 | 0.5  | 0.269 | Elongation factor Ts                                                                  |
| WP_043700023.1 | <i>fadI</i>  | 76 | 0.5  | 0.248 | 3-ketoacyl-CoA thiolase FadI                                                          |
| WP_043695817.1 | NA           | 76 | 0.49 | 0.309 | Putative acetyltransferase                                                            |
| WP_043689748.1 | <i>argB</i>  | 76 | 0.49 | 0.291 | Acetylglutamate kinase                                                                |
| WP_043699440.1 | <i>pccB</i>  | 78 | 0.51 | 0.283 | Propionyl-CoA carboxylase beta chain                                                  |
| WP_174186519.1 | <i>pafA</i>  | 78 | 0.5  | 0.278 | Pup--protein ligase                                                                   |
| WP_043688629.1 | <i>valS</i>  | 78 | 0.49 | 0.285 | Valine--tRNA ligase                                                                   |
| WP_043697816.1 | <i>rplY</i>  | 78 | 0.47 | 0.275 | 50S ribosomal protein L25                                                             |
| WP_040865481.1 | <i>clpP2</i> | 80 | 0.75 | 0.255 | ATP-dependent Clp protease proteolytic subunit 2                                      |
| WP_043694738.1 | NA           | 80 | 0.74 | 0.274 | 35 kDa protein                                                                        |
| WP_039799659.1 | <i>ilvH</i>  | 80 | 0.73 | 0.32  | Acetolactate synthase small subunit                                                   |
| WP_051168666.1 | <i>sir</i>   | 80 | 0.49 | 0.262 | Sulfite reductase                                                                     |
| WP_043685903.1 | <i>lsr2</i>  | 80 | 0.47 | 0.364 | Nucleoid-associated protein Lsr2                                                      |
| WP_043695890.1 | <i>nrdI</i>  | 80 | 0.47 | 0.28  | Protein NrdI                                                                          |
| WP_011206964.1 | <i>carD</i>  | 82 | 0.47 | 0.263 | RNA polymerase-binding transcription factor                                           |



|                |              |    |      |       |                                                             |
|----------------|--------------|----|------|-------|-------------------------------------------------------------|
| WP_063709467.1 | <i>infB</i>  | 82 | 0.47 | 0.257 | Translation initiation factor IF-2                          |
| WP_051169014.1 | <i>sufC</i>  | 82 | 0.47 | 0.245 | Vegetative protein                                          |
| WP_083887487.1 | <i>infC</i>  | 82 | 0.46 | 0.323 | Translation initiation factor IF-3                          |
| WP_043688864.1 | NA           | 82 | 0.46 | 0.276 | tRNA-Gly                                                    |
| WP_083899173.1 | <i>atpB</i>  | 84 | 0.73 | 0.302 | ATP synthase subunit a                                      |
| WP_043688713.1 | <i>lepA</i>  | 84 | 0.47 | 0.284 | Elongation factor 4                                         |
| WP_043698931.1 | <i>rplJ</i>  | 84 | 0.47 | 0.28  | 50S ribosomal protein L10                                   |
| WP_043689752.1 | <i>argG</i>  | 84 | 0.46 | 0.24  | Argininosuccinate synthase                                  |
| WP_043693609.1 | <i>iscU</i>  | 84 | 0.45 | 0.298 | Iron-sulfur cluster assembly scaffold protein               |
| WP_043689275.1 | <i>ctaE</i>  | 84 | 0.45 | 0.282 | putative cytochrome c oxidase subunit 3                     |
| WP_039798939.1 | <i>efp</i>   | 84 | 0.45 | 0.258 | Elongation factor P                                         |
| WP_043688095.1 | NA           | 84 | 0.45 | 0.252 | putative acyl-CoA dehydrogenase fadE25                      |
| WP_043690281.1 | <i>uvrA</i>  | 84 | 0.44 | 0.309 | UvrABC system protein A                                     |
| WP_174377723.1 | <i>narK</i>  | 84 | 0.44 | 0.291 | Nitrate/nitrite transporter NarK                            |
| WP_014981573.1 | NA           | 84 | 0.42 | 0.299 | DUF742 domain-containing protein                            |
| WP_043693618.1 | NA           | 86 | 0.46 | 0.244 | Fe-S cluster assembly protein SufB                          |
| WP_043697415.1 | <i>typA</i>  | 86 | 0.44 | 0.269 | GTP-binding protein TypA/BipA                               |
| WP_086006591.1 | <i>rplD</i>  | 86 | 0.44 | 0.257 | 50S ribosomal protein L4                                    |
| WP_019044571.1 | <i>crp</i>   | 86 | 0.43 | 0.305 | CRP-like cAMP-activated global transcriptional regulator    |
| WP_043693613.1 | <i>csd</i>   | 86 | 0.43 | 0.292 | putative cysteine desulfurase                               |
| WP_043687868.1 | NA           | 86 | 0.43 | 0.252 | succinate dehydrogenase hydrophobic membrane anchor subunit |
| WP_174315456.1 | <i>mtrA</i>  | 88 | 0.44 | 0.307 | DNA-binding response regulator                              |
| WP_043693708.1 | <i>gapA</i>  | 88 | 0.44 | 0.23  | Glyceraldehyde-3-phosphate dehydrogenase                    |
| WP_043695197.1 | <i>rpsB</i>  | 88 | 0.44 | 0.224 | 30S ribosomal protein S2                                    |
| WP_043698933.1 | <i>rplA</i>  | 88 | 0.44 | 0.22  | 50S ribosomal protein L1                                    |
| WP_043691230.1 | <i>rbpA</i>  | 88 | 0.41 | 0.275 | RNA polymerase-binding protein                              |
| WP_011210678.1 | NA           | 88 | 0.38 | 0.282 | DUF2469 domain-containing protein                           |
| WP_043687710.1 | <i>sigD</i>  | 90 | 0.72 | 0.279 | ECF RNA polymerase sigma factor                             |
| WP_174377676.1 | <i>clpP1</i> | 90 | 0.7  | 0.254 | ATP-dependent Clp protease proteolytic subunit 1            |
| WP_043689602.1 | <i>rpsA</i>  | 90 | 0.43 | 0.234 | 30S ribosomal protein S1                                    |
| WP_040864934.1 | <i>rplM</i>  | 90 | 0.42 | 0.266 | 50S ribosomal protein L13                                   |
| WP_043687243.1 | <i>rplC</i>  | 90 | 0.42 | 0.244 | 50S ribosomal protein L3                                    |
| WP_043684967.1 | <i>sodA</i>  | 90 | 0.42 | 0.238 | Superoxide dismutase                                        |
| WP_067803910.1 | NA           | 92 | 0.41 | 0.254 | 30S ribosomal protein S9                                    |
| WP_043698018.1 | <i>sucC</i>  | 92 | 0.41 | 0.248 | Succinate--CoA ligase subunit beta                          |
| WP_043687553.1 | <i>rpsD</i>  | 92 | 0.41 | 0.245 | 30S ribosomal protein S4                                    |
| WP_011210681.1 | <i>rplS</i>  | 92 | 0.39 | 0.246 | 50S ribosomal protein L19                                   |
| WP_043687255.1 | <i>rplV</i>  | 94 | 0.68 | 0.261 | 50S ribosomal protein L22                                   |
| WP_043688633.1 | <i>rplU</i>  | 94 | 0.41 | 0.249 | 50S ribosomal protein L21                                   |
| WP_043687383.1 | NA           | 94 | 0.41 | 0.246 | 30S ribosomal protein S5                                    |
| WP_043687358.1 | <i>rplE</i>  | 94 | 0.41 | 0.244 | 50S ribosomal protein L5                                    |

|                |              |     |      |       |                                                      |
|----------------|--------------|-----|------|-------|------------------------------------------------------|
| WP_043699134.1 | <i>aceA</i>  | 94  | 0.4  | 0.232 | Isocitrate lyase                                     |
| WP_043687258.1 | <i>rpsC</i>  | 94  | 0.38 | 0.243 | 30S ribosomal protein S3                             |
| WP_043693545.1 | <i>inhA</i>  | 94  | 0.37 | 0.286 | Enoyl-[acyl-carrier-protein] reductase               |
| WP_043687556.1 | NA           | 96  | 0.38 | 0.229 | 50S ribosomal protein L17                            |
| WP_011211115.1 | <i>whiB1</i> | 96  | 0.36 | 0.285 | Transcriptional regulator WhiB1                      |
| WP_043693920.1 | <i>ybiT</i>  | 98  | 0.36 | 0.288 | ABC transporter ATP-binding protein                  |
| WP_039798918.1 | <i>rpoZ</i>  | 98  | 0.36 | 0.258 | RNA polymerase subunit omega                         |
| WP_043695253.1 | <i>rpsP</i>  | 98  | 0.36 | 0.226 | 30S ribosomal protein S16                            |
| WP_043693616.1 | NA           | 100 | 0.68 | 0.281 | Fe-S cluster assembly protein                        |
| WP_043686525.1 | NA           | 100 | 0.68 | 0.256 | DUF3073 domain-containing protein                    |
| WP_174377715.1 | <i>ilvC</i>  | 100 | 0.36 | 0.229 | Ketol-acid reductoisomerase (NADP(+))                |
| WP_043687550.1 | <i>rpsM</i>  | 100 | 0.35 | 0.265 | 30S ribosomal protein S13                            |
| WP_043689200.1 | NA           | 102 | 0.67 | 0.28  | iron-sulfur cluster assembly accessory protein       |
| WP_039795549.1 | <i>rpsH</i>  | 102 | 0.35 | 0.271 | 30S ribosomal protein S8                             |
| WP_040782761.1 | <i>sucD</i>  | 102 | 0.34 | 0.217 | Succinate--CoA ligase subunit alpha                  |
| WP_043687250.1 | <i>rpsS</i>  | 102 | 0.33 | 0.221 | 30S ribosomal protein S19                            |
| WP_003418601.1 | <i>infA</i>  | 102 | 0.27 | 0.254 | Translation initiation factor IF-1                   |
| WP_043687380.1 | <i>rplF</i>  | 104 | 0.34 | 0.254 | 50S ribosomal protein L6                             |
| WP_043695887.1 | <i>nrde2</i> | 104 | 0.34 | 0.244 | Ribonucleoside-diphosphate reductase subunit alpha 2 |
| WP_043694830.1 | NA           | 104 | 0.32 | 0.242 | Alkyl hydroperoxide reductase C                      |
| WP_043688224.1 | <i>atpD</i>  | 106 | 0.33 | 0.225 | ATP synthase subunit beta                            |
| WP_011211259.1 | NA           | 106 | 0.31 | 0.289 | DUF3117 domain-containing protein                    |
| WP_014981768.1 | <i>rpsK</i>  | 106 | 0.31 | 0.23  | 30S ribosomal protein S11                            |
| WP_040864865.1 | <i>rplX</i>  | 108 | 0.32 | 0.272 | 50S ribosomal protein L24                            |
| WP_011210730.1 | <i>rpmB</i>  | 108 | 0.29 | 0.209 | 50S ribosomal protein L28                            |
| WP_039795505.1 | <i>rplN</i>  | 110 | 0.29 | 0.271 | 50S ribosomal protein L14                            |
| WP_030525248.1 | <i>rpsG</i>  | 110 | 0.29 | 0.218 | 30S ribosomal protein S7                             |
| WP_043698934.1 | <i>rplK</i>  | 112 | 0.64 | 0.24  | 50S ribosomal protein L11                            |
| WP_003938093.1 | <i>rpsJ</i>  | 112 | 0.28 | 0.227 | 30S ribosomal protein S10                            |
| WP_040870256.1 | <i>rpsL</i>  | 114 | 0.27 | 0.175 | 30S ribosomal protein S12                            |
| WP_039797323.1 | <i>rplT</i>  | 114 | 0.26 | 0.215 | 50S ribosomal protein L20                            |
| WP_040864842.1 | <i>rplP</i>  | 118 | 0.24 | 0.218 | 50S ribosomal protein L16                            |
| WP_011207266.1 | <i>rplW</i>  | 118 | 0.23 | 0.181 | 50S ribosomal protein L23                            |
| WP_028479292.1 | <i>groS</i>  | 120 | 0.24 | 0.282 | co-chaperone GroES                                   |
| WP_011211653.1 | NA           | 122 | 0.61 | 0.206 | 50S ribosomal protein L33                            |
| WP_169334227.1 | NA           | 122 | 0.57 | 0.248 | glycosyltransferase                                  |

RFD: Robinson-Fould Distance;  $\pi$ : Nucleotide diversity
