# Supplementary material for: Whole genome sequencing reveals the genomic diversity, taxonomic classification, and evolutionary relationships of the genus Nocardia
Source: PubMed Central journal article supplement (PMC8437295; doi:10.1371/journal.pntd.0009665), 2021-08-26
Supplement: pntd.0009665.s006.pdf [file pntd.0009665.s006.pdf]

**S6 Table.** Reclassification of genomes that are currently unclassified *Nocardia* species.

| Phylogroup                       | NCBI species                                | closest related type strain                    | ANI value (%) | is DDH (%) | Species                  |
|----------------------------------|---------------------------------------------|------------------------------------------------|---------------|------------|--------------------------|
| <i>N. farcinica</i> group        | <i>Nocardia</i> sp. FDAARGOS_372            | <i>N. farcinica</i> DSM43665 <sup>T</sup>      | 99.15         | 92.4       | <i>N. farcinica</i>      |
| <i>N. farcinica</i> group        | <i>Nocardia</i> sp. SYSU K10002             | <i>N. takedensis</i> DSM44801 <sup>T</sup>     | 80.25         | 23.3       | putative new species 1   |
| <i>N. farcinica</i> group        | <i>Nocardia</i> sp. W9405                   | <i>N. arizonensis</i> DSM45748 <sup>T</sup>    | 99.96         | 99.8       | <i>N. arizonensis</i>    |
| <i>N. farcinica</i> group        | <i>Nocardia</i> sp. CNY236                  | <i>N. amamiensis</i> DSM45066 <sup>T</sup>     | 80.48         | 24.2       | putative new species 2   |
| <i>N. farcinica</i> group        | <i>Nocardia</i> sp. CICC 11023              | <i>N. tenerifensis</i> DSM44704 <sup>T</sup>   | 86.45         | 31.8       | putative new species 3   |
| <i>N. farcinica</i> group        | <i>Nocardia</i> sp. CS682                   | <i>N. ninae</i> DSM44978 <sup>T</sup>          | 99.96         | 63.3       | <i>N. ninae</i>          |
| <i>N. asteroides</i> group       | <i>Nocardia</i> sp. Root136                 | <i>N. salmonicida</i> DSM40472 <sup>T</sup>    | 97.66         | 79.5       | <i>N. salmonicida</i>    |
| <i>N. transvalensis</i> group    | <i>Nocardia</i> sp. BMG111209               | <i>N. stercoris</i> NEAU LL90 <sup>T</sup>     | 77.02         | 21.3       | putative new species 4   |
| <i>N. transvalensis</i> group    | <i>Nocardia</i> sp. RB56                    | <i>N. stercoris</i> NEAU LL90 <sup>T</sup>     | 77.11         | 21.5       | putative new species 5   |
| <i>N. transvalensis</i> group    | <i>Nocardia</i> sp. BMG51109                | <i>N. blacklockiae</i> DSM 45135 <sup>T</sup>  | 83.56         | 27.7       | putative new species 6   |
| <i>N. transvalensis</i> group    | <i>Nocardia</i> sp. RB20                    | <i>N. vaccinii</i> DSM 43285 <sup>T</sup>      | 86.53         | 32.4       | putative new species 7   |
| <i>N. transvalensis</i> group    | <i>Nocardia</i> sp. NRRL WC3656             | <i>N. nova</i> DSM44481 <sup>T</sup>           | 97.78         | 81         | <i>N. nova</i>           |
| <i>N. transvalensis</i> group    | <i>Nocardia</i> sp. 852002-20019_SCH5090214 | <i>N. nova</i> DSM44481 <sup>T</sup>           | 99.13         | 92.3       | <i>N. nova</i>           |
| <i>N. transvalensis</i> group    | <i>Nocardia</i> sp. 852002-51101_SCH5132738 | <i>N. nova</i> DSM44481 <sup>T</sup>           | 99.26         | 93.9       | <i>N. nova</i>           |
| <i>N. transvalensis</i> group    | <i>Nocardia</i> sp. 852002-51244_SCH5132740 | <i>N. nova</i> DSM44481 <sup>T</sup>           | 99.21         | 93.5       | <i>N. nova</i>           |
| <i>N. transvalensis</i> group    | <i>Nocardia</i> sp. MDA0666                 | <i>N. aobensis</i> DSM44805 <sup>T</sup>       | 97.06         | 75.8       | <i>N. aobensis</i>       |
| <i>N. otitidiscaviarum</i> group | <i>Nocardia</i> sp. SYP-A9097               | <i>N. acidivorans</i> DSM 45049 <sup>T</sup>   | 87.76         | 34.7       | putative new species 8   |
| <i>N. otitidiscaviarum</i> group | <i>Nocardia</i> sp. CT2-14                  | <i>N. niigatensis</i> DSM 44670 <sup>T</sup>   | 87.98         | 35.2       | putative new species 9   |
| <i>N. otitidiscaviarum</i> group | <i>Nocardia</i> sp. ET3-3                   | <i>N. concava</i> DSM 44804 <sup>T</sup>       | 86.55         | 32.3       | putative new species 10  |
| outgroup                         | <i>Nocardia</i> sp. 348MFTsu5.1             | <i>Williamsia faeni</i> DSM 45372 <sup>T</sup> | 97.6          | 77.9       | <i>Williamsia faeni</i>  |
| outgroup                         | <i>Nocardia</i> sp. NRRL S-836              | <i>Lechevalieria</i> spp                       | NA            | NA         | <i>Lechevalieria</i> spp |
