# Supplementary material for: Whole genome sequencing reveals the genomic diversity, taxonomic classification, and evolutionary relationships of the genus Nocardia
Source: PubMed Central journal article supplement (PMC8437295; doi:10.1371/journal.pntd.0009665), 2021-08-26
Supplement: pntd.0009665.s007.pdf [file pntd.0009665.s007.pdf]

**S7 Table.** General features of sequenced *Nocardia* species.

| <i>Nocardia</i> * | Strain ID              | GSA ID  | Isolation year | Source                          | Genome Size (Mb) | No. of CDSs | No. of scaffolds | %GC   | No. of tRNAs | No. of rRNAs | No. of tmRNAs |
|-------------------|------------------------|---------|----------------|---------------------------------|------------------|-------------|------------------|-------|--------------|--------------|---------------|
| abscessus         | DSM 44557              | CDC 71  | 2001           | NA                              | 8.08             | 7366        | 95               | 68.47 | 65           | 5            | 1             |
|                   | isolate                | CDC 167 | 2015           | sputum                          | 7.98             | 7209        | 69               | 68.37 | 70           | 6            | 1             |
| africana          | DSM 44500              | CDC 73  | 2000           | sputum                          | 7.73             | 7083        | 32               | 67.93 | 55           | 3            | 1             |
| amikacinitolerans | DSM 45538              | CDC 100 | 2009           | sputum                          | 7.63             | 6718        | 35               | 68.6  | 68           | 4            | 2             |
|                   | DSM 44700              | CDC 104 | 2003           | human                           | 8.19             | 7430        | 46               | 68.82 | 69           | 6            | 1             |
| asiatica          | isolate                | CDC193  | 2015           | sputum                          | 8.92             | 8219        | 77               | 68.39 | 65           | 6            | 1             |
|                   | isolate                | CDC194  | 2016           | brain                           | 7.66             | 6980        | 66               | 68.71 | 58           | 6            | 1             |
| asteroides        | DSM 43258              | CDC 2   | 1990           | soil                            | 7.57             | 6898        | 24               | 68.46 | 65           | 7            | 1             |
| beijingensis      | isolate                | CDC186  | 2015           | sputum                          | 7.20             | 6574        | 40               | 69.13 | 62           | 6            | 1             |
|                   | isolate                | CDC188  | 2015           | sputum                          | 7.44             | 6875        | 101              | 68.04 | 67           | 6            | 1             |
| blacklockiae      | DSM 45135 <sup>T</sup> | CDC 112 | 2007           | human muscle abscess            | 8.29             | 7361        | 33               | 69.95 | 68           | 5            | 1             |
|                   | isolate                | CDC190  | 2015           | sputum                          | 8.10             | 7267        | 34               | 69.82 | 69           | 4            | 1             |
| brasiliensis      | DSM 43009              | CDC126  | 1990           | NA                              | 9.58             | 8644        | 33               | 68.23 | 64           | 6            | 1             |
|                   | DSM 46032              | CDC128  | 1978           | NA                              | 9.09             | 8198        | 29               | 68.27 | 72           | 5            | 1             |
|                   | DSM 46059              | CDC129  | 1979           | NA                              | 9.30             | 8385        | 49               | 68.12 | 65           | 5            | 1             |
|                   | isolate                | CDC144  | 2015           | sputum                          | 9.39             | 8630        | 35               | 67.94 | 70           | 6            | 1             |
|                   | isolate                | CDC163  | 2015           | pus from empysema               | 9.91             | 8913        | 41               | 67.88 | 74           | 5            | 1             |
|                   | isolate                | CDC196  | 2016           | abscess                         | 9.39             | 8584        | 19               | 68.1  | 72           | 6            | 1             |
| carnea            | DSM 44558              | CDC122  | 2001           | NA                              | 7.88             | 7144        | 40               | 66.99 | 63           | 5            | 1             |
|                   | DSM 44582              | CDC123  | 2001           | mineralic building material     | 7.97             | 7219        | 44               | 66.98 | 63           | 5            | 1             |
|                   | DSM 46055              | CDC124  | NA             | NA                              | 7.60             | 6973        | 33               | 67.09 | 57           | 5            | 1             |
|                   | DSM 46071              | CDC125  | 1996           | NA                              | 8.17             | 7451        | 27               | 67.05 | 65           | 4            | 1             |
|                   | DSM 40350              | CDC 133 | 1975           | septicemic actinomycosis of dog | 6.10             | 5524        | 21               | 68.48 | 60           | 5            | 1             |
|                   | DSM 43004              | CDC 134 | 1990           | NA                              | 6.54             | 6149        | 24               | 68.38 | 70           | 5            | 1             |
| cyriaci-georgica  | DSM 43005              | CDC 135 | 1990           | NA                              | 6.54             | 6144        | 25               | 68.38 | 70           | 5            | 1             |
|                   | DSM 43208              | CDC 136 | 1990           | pus from empysema               | 6.65             | 5934        | 31               | 68.26 | 60           | 6            | 1             |
|                   | DSM 46058              | CDC 137 | 1979           | NA                              | 6.36             | 5865        | 54               | 68.4  | 61           | 5            | 1             |
|                   | isolate                | CDC 140 | 2015           | sputum                          | 6.20             | 5569        | 12               | 68.38 | 61           | 5            | 1             |
|                   | isolate                | CDC156  | 2015           | sputum                          | 6.68             | 6064        | 34               | 68.29 | 61           | 5            | 1             |
|                   | isolate                | CDC 182 | 2015           | sputum                          | 6.48             | 5826        | 11               | 68.38 | 63           | 5            | 1             |
|                   | isolate                | CDC 197 | 2016           | lung                            | 6.49             | 5863        | 12               | 68.35 | 62           | 2            | 1             |
|                   | isolate                | CDC 322 | 2016           | pancreatic secretion            | 6.54             | 5857        | 28               | 68.26 | 60           | 5            | 1             |
|                   | isolate                | CDC 323 | 2016           | special materials               | 6.42             | 5823        | 19               | 68.37 | 61           | 6            | 1             |
|                   | isolate                | CDC 327 | 2016           | sputum                          | 6.23             | 5616        | 19               | 68.46 | 59           | 4            | 2             |
|                   | isolate                | CDC 332 | 2016           | alveolar lavage fluid           | 6.21             | 5647        | 26               | 68.46 | 60           | 5            | 1             |
|                   | DSM 46028              | CDC 98  | 1975           | bovine farcy                    | 6.07             | 5640        | 37               | 70.93 | 57           | 3            | 1             |
|                   | isolate                | CDC 25  | 2006           | sputum                          | 6.04             | 5607        | 23               | 70.92 | 57           | 3            | 1             |
|                   | isolate                | CDC 27  | 2011           | sewer rate                      | 6.26             | 5849        | 81               | 70.62 | 61           | 6            | 1             |
| isolate           | CDC 30                 | 2011    | sewer rate     | 6.30                            | 5888             | 77          | 70.61            | 61    | 6            | 1            |               |
| isolate           | CDC 31                 | 2011    | sewer rate     | 6.26                            | 5837             | 74          | 70.62            | 61    | 5            | 1            |               |
| isolate           | CDC 32                 | 2011    | mole           | 6.26                            | 5848             | 79          | 70.62            | 61    | 6            | 1            |               |
| isolate           | CDC 35                 | 2011    | sputum         | 6.30                            | 5886             | 78          | 70.61            | 61    | 6            | 1            |               |

|                  |                        |         |      |                                               |      |      |    |       |    |   |   |
|------------------|------------------------|---------|------|-----------------------------------------------|------|------|----|-------|----|---|---|
| farcinica        | isolate                | CDC 38  | 2011 | sputum                                        | 6.30 | 5884 | 77 | 70.61 | 61 | 5 | 1 |
|                  | isolate                | CDC 42  | 2011 | sputum                                        | 6.11 | 5705 | 39 | 70.89 | 56 | 6 | 1 |
|                  | isolate                | CDC 46  | 2010 | sputum                                        | 6.39 | 5929 | 36 | 70.72 | 56 | 5 | 1 |
|                  | isolate                | CDC 48  | 2011 | sputum                                        | 6.59 | 6093 | 51 | 70.77 | 57 | 4 | 1 |
|                  | isolate                | CDC 53  | 2010 | sputum                                        | 6.39 | 5934 | 41 | 70.72 | 56 | 6 | 1 |
|                  | isolate                | CDC 56  | 2010 | sputum                                        | 6.33 | 5854 | 50 | 70.76 | 56 | 5 | 1 |
|                  | isolate                | CDC 59  | 2010 | sputum                                        | 6.39 | 5929 | 40 | 70.72 | 56 | 5 | 1 |
|                  | isolate                | CDC 65  | 2010 | sputum                                        | 6.14 | 5771 | 40 | 70.86 | 62 | 3 | 1 |
| inohanensis      | isolate                | CDC 142 | 2015 | sputum                                        | 6.11 | 5693 | 25 | 70.72 | 60 | 6 | 1 |
|                  | isolate                | CDC 153 | 2015 | eye secretion                                 | 8.22 | 7589 | 15 | 67.93 | 68 | 6 | 1 |
|                  | DSM 43207              | CDC 16  | 1990 | foot sinus                                    | 7.86 | 7081 | 39 | 67.86 | 58 | 3 | 1 |
| nova             | DSM 40806              | CDC 119 | 1993 | NA                                            | 7.85 | 7141 | 30 | 67.79 | 63 | 6 | 1 |
|                  | DSM 43209              | CDC 120 | 1990 | foot sinus                                    | 7.87 | 7090 | 43 | 67.86 | 58 | 4 | 1 |
|                  | DSM 44559              | CDC 121 | 2001 | NA                                            | 7.81 | 7061 | 27 | 67.94 | 60 | 6 | 1 |
|                  | isolate                | CDC 141 | 2014 | sputum                                        | 7.86 | 7376 | 50 | 68.57 | 59 | 5 | 1 |
|                  | isolate                | CDC 159 | 2015 | sputum                                        | 7.87 | 7381 | 51 | 68.57 | 59 | 5 | 1 |
| novocastrense    | DSM 44692 <sup>T</sup> | CDC 110 | 2003 | bronchial lavage of a lung transplant patient | 6.69 | 6308 | 60 | 71.66 | 75 | 4 | 1 |
|                  | DSM 44565              | CDC 21  | 2001 | sputum                                        | 7.33 | 6653 | 33 | 69.04 | 87 | 5 | 1 |
|                  | DSM 43010              | CDC 116 | 1990 | NA                                            | 7.36 | 6729 | 43 | 68.99 | 89 | 6 | 2 |
|                  | DSM 43398              | CDC 117 | 1993 | NA                                            | 7.51 | 6766 | 27 | 69.03 | 82 | 5 | 1 |
| otitidiscaviarum | isolate                | CDC155  | 2015 | sputum                                        | 7.25 | 6596 | 36 | 69.08 | 82 | 6 | 1 |
|                  | isolate                | CDC157  | 2015 | liver puncture                                | 7.61 | 6922 | 35 | 68.97 | 79 | 4 | 1 |
|                  | isolate                | CDC195  | 2016 | lung                                          | 7.30 | 6645 | 42 | 69.03 | 88 | 6 | 1 |
|                  | isolate                | CDC324  | 2016 | dialysate                                     | 7.66 | 6938 | 34 | 68.97 | 81 | 5 | 1 |
|                  | isolate                | CDC326  | 2016 | sputum                                        | 7.57 | 6912 | 41 | 69.04 | 82 | 6 | 2 |
| transvalensis    | DSM 46068              | CDC 115 | 1979 | foot                                          | 8.72 | 8075 | 13 | 69.23 | 65 | 5 | 1 |
| vaccinii         | isolate                | CDC 160 | 2015 | sputum                                        | 8.57 | 7787 | 19 | 67.45 | 67 | 6 | 1 |
| veterana         | isolate                | CDC 181 | 2015 | alveolar lavage fluid                         | 6.54 | 5890 | 74 | 68.29 | 59 | 3 | 1 |
| wallacei         | DSM 45136 <sup>T</sup> | CDC 113 | 2007 | sputum                                        | 8.04 | 7327 | 65 | 69.12 | 66 | 6 | 1 |
|                  | DSM 45846              | CDC 114 | 2013 | human lungs- broncholaveolar lavage           | 7.29 | 6479 | 37 | 69.48 | 69 | 6 | 1 |

\*16S rRNA identification result

<sup>T</sup> type strains
