# Supplementary material for: Whole genome sequencing reveals the genomic diversity, taxonomic classification, and evolutionary relationships of the genus Nocardia
Source: PubMed Central journal article supplement (PMC8437295; doi:10.1371/journal.pntd.0009665), 2021-08-26

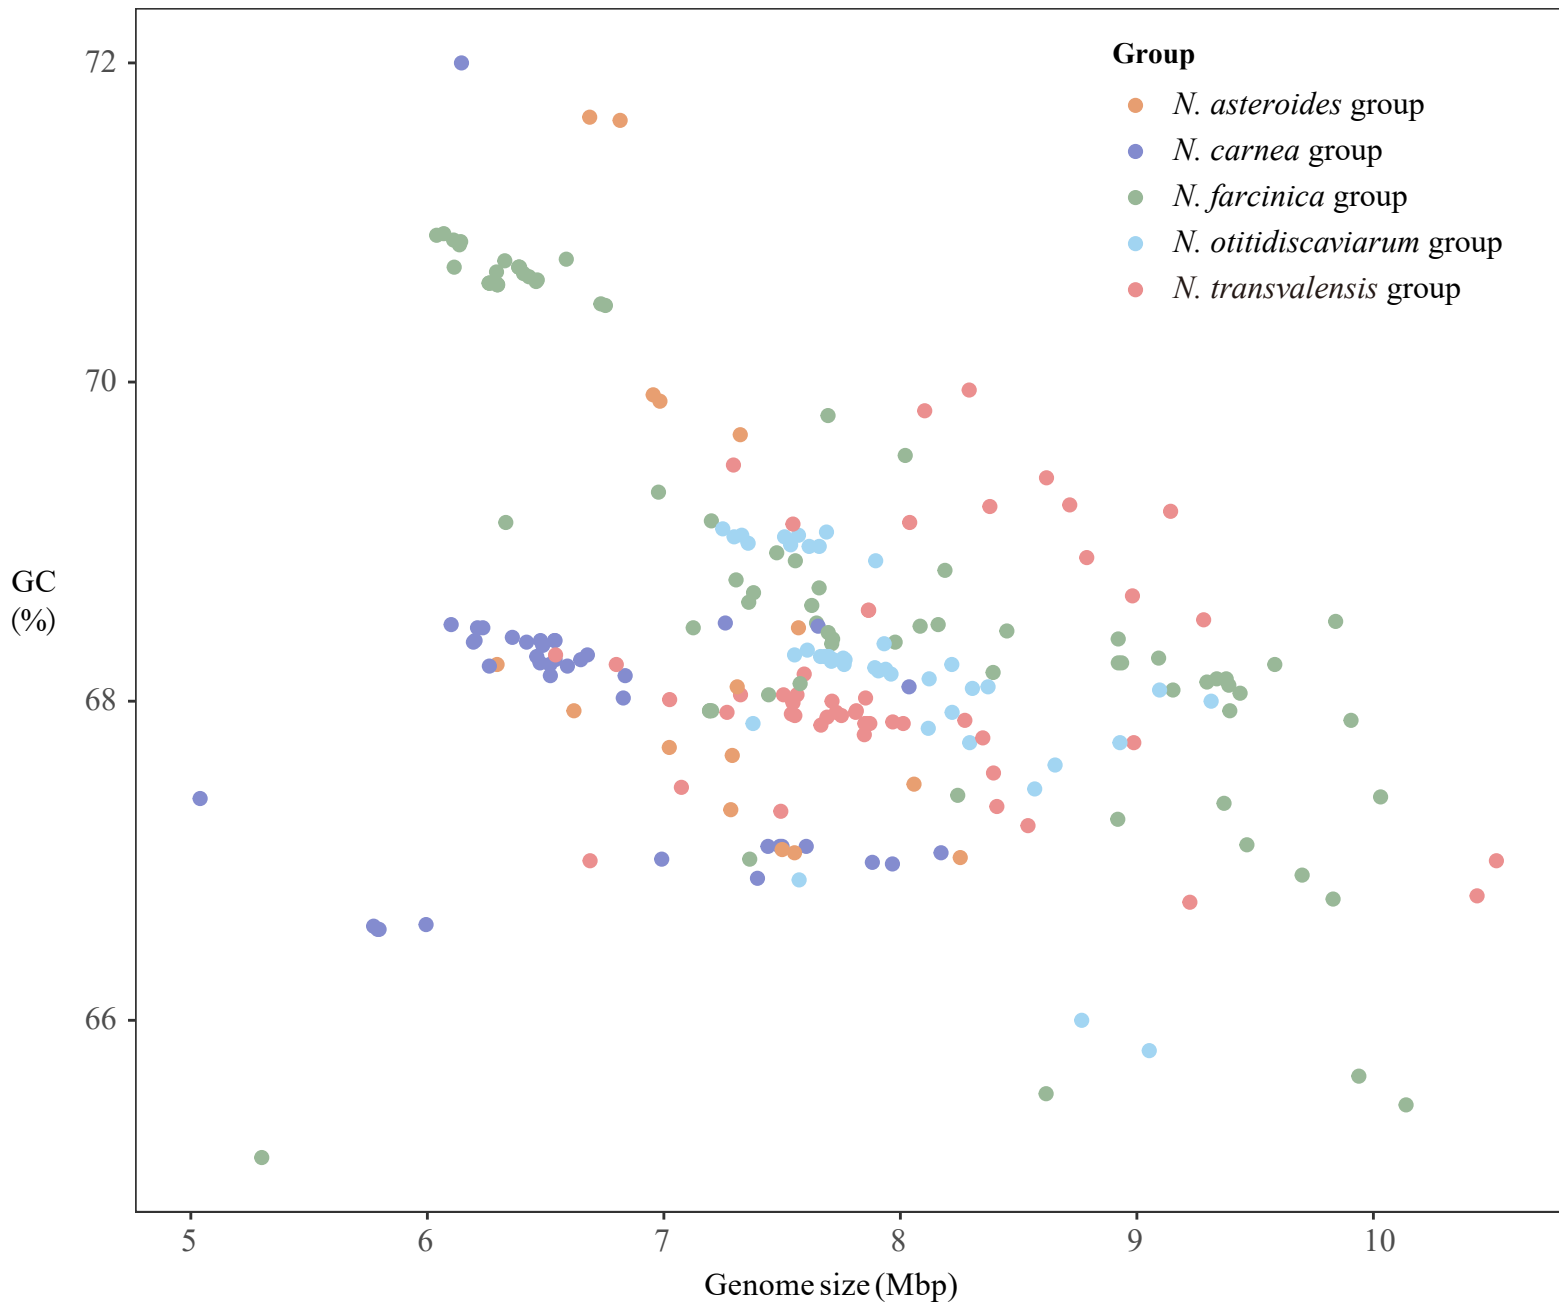

Supplement: pntd.0009665.s008.pdf [file pntd.0009665.s008.pdf]
