# Supplementary material for: Whole genome sequencing reveals the genomic diversity, taxonomic classification, and evolutionary relationships of the genus Nocardia
Source: PubMed Central journal article supplement (PMC8437295; doi:10.1371/journal.pntd.0009665), 2021-08-26
Supplement: pntd.0009665.s009.pdf [file pntd.0009665.s009.pdf]

A

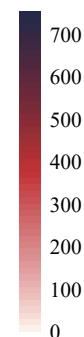

|   |   |     |    |     |     |     |     |     |     |     |     |     |    |     |     |     |     |    |     |   |   |                                        |
|---|---|-----|----|-----|-----|-----|-----|-----|-----|-----|-----|-----|----|-----|-----|-----|-----|----|-----|---|---|----------------------------------------|
| 0 | 0 | 46  | 28 | 55  | 14  | 54  | 24  | 52  | 22  | 148 | 55  | 33  | 8  | 20  | 43  | 88  | 32  | 13 | 11  | 0 | 0 | <i>N. abscessus</i> DSM 44432          |
| 3 | 1 | 188 | 74 | 249 | 55  | 221 | 119 | 196 | 139 | 372 | 132 | 169 | 24 | 106 | 179 | 271 | 162 | 42 | 78  | 0 | 4 | <i>N. acidivorans</i> DSM 45049        |
| 0 | 0 | 52  | 15 | 38  | 12  | 33  | 22  | 60  | 14  | 108 | 41  | 25  | 8  | 20  | 28  | 106 | 37  | 8  | 7   | 0 | 0 | <i>N. africana</i> DSM 44491           |
| 1 | 0 | 68  | 20 | 65  | 22  | 78  | 25  | 85  | 32  | 190 | 38  | 48  | 5  | 23  | 91  | 97  | 39  | 12 | 16  | 0 | 1 | <i>N. alba</i> DSM 44684               |
| 4 | 0 | 194 | 49 | 297 | 61  | 261 | 145 | 186 | 132 | 422 | 120 | 170 | 28 | 112 | 194 | 292 | 178 | 47 | 100 | 1 | 4 | <i>N. altamirensis</i> DSM 44997       |
| 0 | 0 | 62  | 51 | 72  | 32  | 71  | 41  | 49  | 35  | 185 | 125 | 46  | 12 | 24  | 58  | 98  | 44  | 22 | 19  | 1 | 0 | <i>N. amamiensis</i> DSM 45066         |
| 0 | 0 | 51  | 18 | 37  | 11  | 40  | 19  | 52  | 12  | 122 | 39  | 27  | 10 | 17  | 37  | 72  | 38  | 11 | 14  | 0 | 2 | <i>N. amikacinotolerans</i> DSM 45539  |
| 0 | 0 | 85  | 19 | 72  | 17  | 68  | 40  | 68  | 34  | 208 | 55  | 45  | 13 | 21  | 46  | 74  | 49  | 11 | 16  | 0 | 2 | <i>N. anaemiae</i> DSM 44821           |
| 0 | 0 | 21  | 7  | 26  | 5   | 14  | 9   | 30  | 6   | 48  | 18  | 8   | 1  | 2   | 16  | 27  | 9   | 2  | 6   | 1 | 0 | <i>N. aobensis</i> DSM 44805           |
| 0 | 0 | 47  | 18 | 42  | 12  | 54  | 26  | 47  | 19  | 128 | 60  | 19  | 6  | 19  | 37  | 61  | 25  | 7  | 17  | 0 | 0 | <i>N. araoensis</i> DSM 44729          |
| 1 | 2 | 161 | 57 | 181 | 41  | 135 | 89  | 170 | 108 | 386 | 157 | 149 | 21 | 82  | 170 | 216 | 142 | 38 | 65  | 0 | 0 | <i>N. arizonensis</i> DSM 45748        |
| 1 | 0 | 18  | 7  | 9   | 8   | 10  | 5   | 15  | 6   | 48  | 23  | 10  | 4  | 6   | 13  | 31  | 10  | 7  | 2   | 1 | 0 | <i>N. arthritis</i> DSM 44731          |
| 0 | 0 | 46  | 24 | 75  | 24  | 50  | 37  | 37  | 26  | 149 | 72  | 47  | 7  | 34  | 59  | 72  | 55  | 23 | 23  | 0 | 0 | <i>N. asiatica</i> DSM 44669           |
| 1 | 0 | 98  | 20 | 118 | 25  | 119 | 55  | 83  | 70  | 303 | 83  | 74  | 14 | 47  | 111 | 124 | 88  | 25 | 42  | 0 | 0 | <i>N. asteroides</i> DSM 43757         |
| 1 | 0 | 47  | 11 | 28  | 5   | 42  | 20  | 32  | 22  | 102 | 35  | 18  | 8  | 19  | 32  | 55  | 33  | 16 | 14  | 0 | 0 | <i>N. beijingensis</i> DSM 44636       |
| 0 | 1 | 29  | 9  | 27  | 5   | 19  | 9   | 21  | 9   | 63  | 17  | 19  | 2  | 10  | 25  | 31  | 20  | 6  | 11  | 0 | 0 | <i>N. bhagyanarayanae</i> DSM 103495   |
| 0 | 0 | 135 | 32 | 143 | 43  | 147 | 79  | 90  | 89  | 379 | 61  | 97  | 19 | 59  | 131 | 202 | 127 | 34 | 40  | 0 | 1 | <i>N. blacklockiae</i> DSM 45135       |
| 0 | 0 | 27  | 13 | 28  | 7   | 19  | 23  | 18  | 19  | 70  | 20  | 12  | 1  | 15  | 24  | 30  | 23  | 3  | 12  | 0 | 1 | <i>N. brasiliensis</i> DSM 43758       |
| 2 | 3 | 114 | 38 | 120 | 34  | 118 | 74  | 153 | 84  | 310 | 157 | 81  | 9  | 44  | 127 | 193 | 89  | 17 | 41  | 1 | 1 | <i>N. brevicatena</i> DSM 43024        |
| 0 | 0 | 33  | 15 | 40  | 11  | 41  | 19  | 22  | 24  | 112 | 41  | 21  | 10 | 22  | 35  | 33  | 28  | 15 | 16  | 0 | 0 | <i>N. caishijiensis</i> DSM 44831      |
| 0 | 0 | 44  | 19 | 47  | 14  | 48  | 26  | 52  | 21  | 119 | 32  | 27  | 10 | 10  | 66  | 73  | 44  | 17 | 15  | 0 | 0 | <i>N. carnea</i> DSM 43397             |
| 1 | 0 | 41  | 6  | 23  | 5   | 18  | 7   | 46  | 7   | 53  | 12  | 8   | 3  | 4   | 33  | 33  | 5   | 6  | 3   | 0 | 0 | <i>N. cerradoensis</i> DSM 44546       |
| 0 | 0 | 154 | 33 | 186 | 40  | 178 | 94  | 123 | 105 | 427 | 103 | 122 | 19 | 80  | 137 | 188 | 158 | 25 | 39  | 0 | 2 | <i>N. concava</i> DSM 44804            |
| 3 | 1 | 259 | 63 | 386 | 65  | 289 | 168 | 256 | 169 | 728 | 170 | 224 | 34 | 129 | 332 | 349 | 234 | 58 | 91  | 0 | 3 | <i>N. crassostreae</i> DSM 44597       |
| 0 | 2 | 156 | 60 | 197 | 41  | 167 | 100 | 151 | 123 | 491 | 132 | 153 | 17 | 87  | 204 | 215 | 140 | 33 | 62  | 0 | 0 | <i>N. cyriacigeorgica</i> DSM 44484    |
| 1 | 3 | 119 | 41 | 185 | 35  | 134 | 99  | 162 | 109 | 357 | 111 | 124 | 21 | 78  | 158 | 226 | 105 | 34 | 54  | 0 | 0 | <i>N. donostiensis</i> DSM 46814       |
| 0 | 0 | 29  | 4  | 24  | 2   | 25  | 16  | 25  | 8   | 49  | 15  | 9   | 4  | 6   | 15  | 39  | 17  | 9  | 13  | 1 | 0 | <i>N. exalbida</i> DSM 44883           |
| 0 | 2 | 148 | 38 | 186 | 37  | 134 | 92  | 151 | 100 | 443 | 135 | 106 | 16 | 81  | 182 | 227 | 129 | 27 | 62  | 0 | 0 | <i>N. farcinica</i> DSM 43665          |
| 1 | 0 | 67  | 18 | 58  | 8   | 59  | 34  | 128 | 12  | 126 | 41  | 25  | 12 | 16  | 58  | 124 | 24  | 9  | 17  | 0 | 0 | <i>N. flavorosea</i> DSM 44480         |
| 1 | 0 | 43  | 30 | 57  | 20  | 57  | 9   | 55  | 25  | 165 | 113 | 33  | 10 | 28  | 61  | 83  | 51  | 15 | 20  | 0 | 1 | <i>N. fluminea</i> DSM 44489           |
| 0 | 3 | 79  | 14 | 70  | 12  | 45  | 36  | 72  | 21  | 134 | 42  | 25  | 5  | 20  | 58  | 90  | 29  | 15 | 18  | 0 | 0 | <i>N. fusca</i> NBRC 14340             |
| 1 | 1 | 31  | 12 | 36  | 8   | 38  | 14  | 32  | 13  | 65  | 27  | 21  | 5  | 4   | 23  | 37  | 16  | 7  | 6   | 0 | 0 | <i>N. grenadensis</i> DSM 45869        |
| 1 | 2 | 219 | 57 | 245 | 54  | 172 | 118 | 306 | 123 | 628 | 147 | 159 | 23 | 104 | 237 | 333 | 173 | 55 | 77  | 0 | 0 | <i>N. harenae</i> DSM 45095            |
| 1 | 0 | 131 | 25 | 107 | 22  | 83  | 48  | 150 | 40  | 240 | 64  | 64  | 11 | 45  | 145 | 178 | 59  | 20 | 27  | 0 | 0 | <i>N. higoensis</i> DSM 44732          |
| 2 | 0 | 42  | 27 | 59  | 16  | 51  | 30  | 35  | 36  | 138 | 72  | 34  | 9  | 22  | 58  | 73  | 52  | 11 | 16  | 0 | 2 | <i>N. ignorata</i> DSM 44496           |
| 0 | 0 | 99  | 19 | 120 | 28  | 113 | 52  | 116 | 59  | 316 | 64  | 84  | 16 | 42  | 91  | 175 | 110 | 26 | 42  | 0 | 2 | <i>N. inohanensis</i> DSM 44667        |
| 2 | 1 | 236 | 71 | 300 | 60  | 231 | 123 | 259 | 155 | 628 | 143 | 188 | 19 | 107 | 233 | 338 | 213 | 42 | 81  | 0 | 2 | <i>N. jejuensis</i> DSM 44959          |
| 1 | 0 | 228 | 39 | 173 | 46  | 137 | 83  | 250 | 58  | 355 | 75  | 76  | 11 | 39  | 133 | 260 | 77  | 15 | 24  | 0 | 1 | <i>N. jiangxiensis</i> DSM 17684       |
| 1 | 3 | 67  | 8  | 79  | 16  | 72  | 32  | 90  | 27  | 152 | 31  | 27  | 2  | 15  | 74  | 100 | 36  | 9  | 20  | 0 | 1 | <i>N. jinanensis</i> DSM 45048         |
| 1 | 0 | 8   | 4  | 8   | 3   | 12  | 4   | 6   | 8   | 32  | 23  | 8   | 1  | 8   | 5   | 15  | 7   | 3  | 4   | 0 | 0 | <i>N. kruczakiae</i> DSM 44877         |
| 0 | 0 | 14  | 4  | 10  | 1   | 15  | 2   | 20  | 12  | 37  | 11  | 7   | 2  | 5   | 12  | 21  | 10  | 3  | 7   | 0 | 0 | <i>N. lijiangensis</i> DSM 44933       |
| 3 | 1 | 113 | 44 | 141 | 39  | 116 | 64  | 102 | 59  | 328 | 131 | 85  | 17 | 61  | 175 | 145 | 101 | 22 | 55  | 0 | 0 | <i>N. mangyaensis</i> Y48              |
| 0 | 2 | 193 | 61 | 277 | 79  | 253 | 117 | 219 | 126 | 667 | 106 | 154 | 26 | 98  | 248 | 299 | 182 | 41 | 81  | 0 | 5 | <i>N. mexicana</i> DSM 44952           |
| 0 | 0 | 22  | 5  | 16  | 4   | 11  | 15  | 41  | 5   | 40  | 18  | 9   | 1  | 3   | 5   | 31  | 11  | 2  | 5   | 0 | 0 | <i>N. mikamii</i> DSM 45174            |
| 1 | 0 | 210 | 45 | 188 | 39  | 136 | 79  | 281 | 63  | 369 | 112 | 81  | 15 | 50  | 170 | 267 | 91  | 19 | 21  | 0 | 1 | <i>N. miyunensis</i> DSM 17685         |
| 1 | 0 | 126 | 31 | 138 | 41  | 135 | 53  | 89  | 59  | 373 | 87  | 71  | 13 | 60  | 120 | 147 | 97  | 20 | 36  | 0 | 0 | <i>N. neocaledoniensis</i> DSM 44717   |
| 4 | 0 | 170 | 40 | 127 | 40  | 137 | 73  | 143 | 95  | 425 | 112 | 98  | 19 | 73  | 125 | 214 | 140 | 35 | 38  | 0 | 1 | <i>N. niigatensis</i> DSM 44670        |
| 0 | 0 | 33  | 30 | 42  | 20  | 24  | 21  | 31  | 17  | 110 | 55  | 29  | 7  | 27  | 25  | 55  | 27  | 11 | 23  | 0 | 0 | <i>N. ninae</i> DSM 44978              |
| 0 | 0 | 35  | 11 | 40  | 10  | 46  | 17  | 25  | 18  | 93  | 35  | 19  | 11 | 13  | 31  | 32  | 40  | 10 | 11  | 0 | 0 | <i>N. niwae</i> DSM 45340              |
| 0 | 0 | 53  | 8  | 31  | 6   | 36  | 19  | 73  | 14  | 95  | 24  | 21  | 7  | 13  | 30  | 69  | 28  | 6  | 9   | 0 | 0 | <i>N. nova</i> DSM 44481               |
| 0 | 1 | 164 | 57 | 243 | 51  | 195 | 96  | 156 | 126 | 526 | 133 | 165 | 22 | 96  | 222 | 235 | 166 | 44 | 61  | 0 | 2 | <i>N. otitidiscaviarum</i> DSM 43242   |
| 7 | 2 | 255 | 82 | 301 | 79  | 301 | 145 | 222 | 157 | 621 | 191 | 207 | 27 | 121 | 282 | 311 | 190 | 57 | 96  | 0 | 4 | <i>N. panacis</i> YIM PH 21724         |
| 0 | 4 | 77  | 31 | 82  | 17  | 80  | 45  | 70  | 52  | 210 | 71  | 68  | 9  | 31  | 92  | 118 | 59  | 21 | 33  | 0 | 2 | <i>N. paucivorans</i> DSM 44386        |
| 1 | 0 | 47  | 16 | 37  | 21  | 43  | 33  | 38  | 24  | 126 | 42  | 41  | 9  | 15  | 38  | 64  | 43  | 8  | 13  | 0 | 0 | <i>N. pneumoniae</i> DSM 44730         |
| 2 | 1 | 288 | 78 | 381 | 78  | 323 | 182 | 262 | 172 | 669 | 151 | 220 | 27 | 171 | 303 | 422 | 242 | 58 | 96  | 0 | 8 | <i>N. pseudobrasiliensis</i> DSM 44290 |
| 0 | 0 | 93  | 37 | 87  | 19  | 66  | 46  | 126 | 32  | 216 | 80  | 47  | 14 | 20  | 54  | 147 | 39  | 18 | 18  | 1 | 0 | <i>N. pseudovaccinii</i> DSM 43406     |
| 1 | 1 | 151 | 49 | 246 | 65  | 187 | 99  | 170 | 121 | 522 | 142 | 156 | 27 | 109 | 254 | 259 | 156 | 42 | 75  | 0 | 0 | <i>N. puris</i> DSM 44599              |
| 3 | 1 | 31  | 5  | 41  | 2   | 33  | 12  | 43  | 16  | 93  | 26  | 15  | 3  | 11  | 35  | 54  | 20  | 6  | 11  | 0 | 0 | <i>N. rhamnosiphila</i> DSM 45147      |
| 1 | 0 | 57  | 25 | 72  | 26  | 59  | 25  | 50  | 36  | 184 | 58  | 48  | 3  | 30  | 62  | 89  | 70  | 11 | 22  | 0 | 0 | <i>N. salmonicida</i> DSM 40472        |
| 1 | 0 | 98  | 36 | 119 | 29  | 103 | 70  | 115 | 74  | 317 | 111 | 90  | 17 | 60  | 79  | 136 | 119 | 26 | 38  | 0 | 1 | <i>N. seriolae</i> DSM 44129           |
| 0 | 0 | 10  | 8  | 17  | 6   | 10  | 7   | 5   | 11  | 55  | 20  | 14  | 2  | 10  | 18  | 13  | 15  | 5  | 1   | 0 | 0 | <i>N. shimofusensis</i> DSM 44733      |
| 0 | 1 | 28  | 8  | 20  | 8   | 26  | 20  | 21  | 14  | 55  | 17  | 11  | 6  | 11  | 21  | 46  | 16  | 12 | 7   | 0 | 0 | <i>N. sienata</i> DSM 44766            |
| 1 | 1 | 55  | 16 | 67  | 15  | 61  | 23  | 86  | 28  | 135 | 32  | 25  | 8  | 12  | 96  | 83  | 47  | 13 | 22  | 1 | 1 | <i>N. speluncae</i> DSM 45078          |
| 2 | 3 | 292 | 75 | 368 | 73  | 279 | 130 | 318 | 181 | 671 | 177 | 219 | 32 | 143 | 333 | 359 | 236 | 53 | 88  | 1 | 1 | <i>N. stercoris</i> NEAU LL90          |
| 0 | 0 | 34  | 21 | 30  | 10  | 40  | 21  | 37  | 16  | 112 | 33  | 44  | 6  | 13  | 25  | 53  | 41  | 11 | 17  | 0 | 0 | <i>N. suismassiliense</i> S137         |
| 1 | 2 | 209 | 72 | 233 | 72  | 168 | 115 | 220 | 119 | 409 | 186 | 160 | 39 | 107 | 209 | 299 | 171 | 59 | 84  | 0 | 1 | <i>N. takedensis</i> DSM 44801         |
| 3 | 0 | 189 | 44 | 225 | 69  | 221 | 130 | 212 | 96  | 427 | 102 | 122 | 17 | 82  | 142 | 277 | 153 | 32 | 75  | 0 | 5 | <i>N. tenerifensis</i> DSM 44704       |
| 3 | 1 | 308 | 86 | 406 | 105 | 364 | 201 | 248 | 164 | 753 | 251 | 221 | 44 | 152 | 283 | 406 | 240 | 75 | 106 | 0 | 4 | <i>N. terpenica</i> IFM 0406           |
| 1 | 3 | 28  | 11 | 31  | 10  | 34  | 19  | 14  | 27  |     |     |     |    |     |     |     |     |    |     |   |   |                                        |
