# Supplementary material for: Whole genome sequencing reveals the genomic diversity, taxonomic classification, and evolutionary relationships of the genus Nocardia
Source: PLoS Negl Trop Dis. 2021 Aug 26;15(8):e0009665. doi: 10.1371/journal.pntd.0009665 (PMC8437295; doi:10.1371/journal.pntd.0009665)
Supplement: S5 Table — (PDF) [file pntd.0009665.s005.pdf]

**S5 Table.** *in silico* DNA-DNA hybridization values between type strains

[illegible]
